1 **ARTICLE**

2 **TITLE: HSA<sup>+</sup> immature cardiomyocytes persist in the adult heart and expand after**  
3 **ischemic injury**

4

5 SHORT TITLE: Immature cardiomyocytes expand in the adult heart

6

7 AUTHORS:

8 Mariana Valente<sup>1,2,3,4,#,\*</sup>, Tatiana Pinho Resende<sup>1,2,\*</sup>, Diana Santos Nascimento<sup>1,2</sup>, Odile  
9 Burlen-Defranoux<sup>4,5</sup>, Benoit Dupont<sup>6</sup>, Ana Cumano<sup>4,5,§</sup> and Perpétua Pinto-do-Ó<sup>1,2,3,4,§</sup>

10

11 AUTHOR AFFILIATIONS:

12 <sup>1</sup>I3S – Instituto de Investigação e Inovação em Saúde, Universidade do Porto, 4200-  
13 135, Porto, Portugal.

14 <sup>2</sup>INEB – Instituto Nacional de Engenharia Biomédica, Universidade do Porto, 4200-135,  
15 Porto, Portugal.

16 <sup>3</sup>ICBAS – Instituto de Ciências Biomédicas Abel Salazar, Universidade do Porto, 4050-  
17 313, Porto, Portugal.

18 <sup>4</sup>Unit for Lymphopoiesis, Immunology Department, INSERM U1223, Institut Pasteur,  
19 75015, Paris, France.

20 <sup>5</sup>Université Paris Diderot, Sorbonne Paris Cité, Cellule Pasteur, 75018, Paris, France.

21 <sup>6</sup>Beckman Coulter, France S.A.S, 93420 Villepinte, France.

22 <sup>#</sup>Present address: Cellular, Molecular and Physiological Mechanisms of Heart Failure,  
23 Paris - Cardiovascular Research Center (PARCC) – European Georges Pompidou  
24 Hospital (HEGP), INSERM - U970, F-75737 Paris Cedex 15, Paris, France.

25

26 \*M.V. and T.P.R. co-first authors.

27 <sup>§</sup>A.C. and P.P.O. co-senior authors.

28

29

30 **Abstract**

31 The assessment of the regenerative capacity of the heart has been compromised by  
32 the lack of surface signatures to characterize cardiomyocytes. Here, combined  
33 multiparametric surface marker analysis with single cell transcriptional profiling and in  
34 vivo transplantation, identify the main fetal cardiac populations and their progenitors.  
35 We found that cardiomyocytes at different stages of differentiation co-exist during  
36 development. We identified a population of immature HSA/CD24<sup>+</sup> cardiomyocytes  
37 that persists throughout life and that, unlike other cardiomyocyte subsets, actively  
38 proliferates up to one week of age and engraft cardiac tissue upon transplantation. In  
39 adult heart HSA/CD24<sup>+</sup> cardiomyocytes appear as mononucleated cells that cycle  
40 and increase in frequency after infarction. Our work identified cell surface signatures  
41 that allow the prospective isolation of cardiomyocytes at any developmental stage  
42 and the detection of adult cardiomyocytes poised for activation in response to  
43 ischemic stimuli. This work opens new perspectives in the understanding and  
44 treatment of heart pathologies.

## 45 **Introduction**

46 The cell types that form the mammalian heart have diverse developmental origins  
47 and temporal differentiation<sup>1</sup>. In the mouse, cardiomyocytes (CMs) are initially  
48 specified by embryonic day (E) 7.5 from the first set of cardiogenic progenitors (first  
49 heart field)<sup>2</sup> followed by the incoming cells from the second heart field (SHF)<sup>3</sup>. At E  
50 9.5 (looping-heart stage), the heart is divided into primitive (*P*) atria (*At*), ventricle *Vt*  
51 (*PVt*) and outflow track (*OFT*, future great vessels and atrioventricular junction *GV-*  
52 *AVJ*) and is composed of CMs and endocardial cells (EndoCs) that form the  
53 endocardium. Cells migrating from the peripheral tissues shape the final heart  
54 morphology. From E9.5 to E11.0, epicardial cells (EpiCs) derive from the  
55 proepicardial organ and coat the heart surface (epicardium). A fraction of EpiCs  
56 undergo epithelial-to-mesenchymal transition (EMT), giving rise to epicardial-derived  
57 cells (EPDCs), which migrate into the myocardium and generate peri-vascular  
58 smooth muscle cells (SMCs)<sup>4</sup> and interstitial fibroblasts (FBs)<sup>5,6</sup>.

59 CMs contribute to heart growth<sup>7,8</sup> through extensive cell divisions, exiting cell  
60 cycle as development progresses, a process virtually completed by the end of the  
61 first week of postnatal life<sup>9</sup>. The CM compartment enlarges thereafter by hypertrophy  
62 that in rodents coincides with binucleation of myocytes<sup>9,10</sup>.

63 Several markers have been individually used to identify CMs (SIRP $\alpha$ , VCAM-1,  
64 Caveolin-3 (Cav3)<sup>11-13</sup>) and their putative adult progenitors (Sca-1<sup>14,15</sup>, c-kit<sup>16</sup>), FBs  
65 (Ddr2, Thy1<sup>17,18</sup>), SMCs (PDGFr $\beta$ <sup>19</sup>) and ECs (PECAM-1<sup>20</sup>). However, because each  
66 of these markers is expressed in other cell types, including circulating and heart  
67 resident hematopoietic cells, they do not, when used alone, unambiguously define  
68 cardiac progenitors (PRGs) or mature populations.

69 Myocardium regeneration requires the production of new adult CMs. Consistent  
70 with a potential regenerative capacity of the adult heart, CM replacement by  
71 expansion, albeit at low rate, has been recently reported indicating that not all adult  
72 CMs are post-mitotic cells<sup>21,22</sup>. However, the efforts to unravel mechanism/s of neo-

73 cardiomyogenesis have been hampered by the lack of strategies to identify and  
74 prospectively isolate the rare CM capable of turnover in normal and diseased hearts.

75 To identify different maturation stages of CMs and to follow their development up  
76 to adulthood we analyzed the phenotype of all cells in the developing mouse heart.  
77 Multi-parametric flow cytometry combined with single cell multiplex qRT-PCR of  
78 purified cell subsets allows the identification of distinct cell types and the definition of  
79 their lineage affiliation. HSA (CD24) expression is consistently associated with the  
80 CM lineage and, combined with other surface proteins, unraveled coexisting subsets  
81 of CMs at different stages of maturation. The most immature population expresses  
82 HSA, ALCAM, MCAM and troponin T (Tnnt), but not Cav3 and is capable to integrate  
83 heart tissue, after transplantation. The progressive loss of those surface markers  
84 contemporaneous with the expression of Cav3 and binucleation identifies mature  
85 CMs. Importantly, HSA<sup>+</sup>, but not HSA<sup>-</sup> Cav3<sup>+</sup> CM, isolated throughout development  
86 and up to P7 actively proliferate and spontaneously acquire contractile properties *in*  
87 *vitro*. Isolated from E15, they engraft heart tissue transplanted in the ear pinna of  
88 adult mice and persist, albeit at low frequencies, in adult hearts. This population  
89 responds to myocardial infarction (MI) by proliferating and increasing in numbers.

90

## 91 **Results**

92 **Phenotype assignment to the cellular components in the fetal heart.** To resolve  
93 the phenotype of the cellular components of the developing heart, we screened by  
94 flow cytometry cell suspensions isolated from the three heart regions (i.e. *At*, *GV-AVJ*  
95 – containing the connection of the four cavities, the great vessels and the valves –  
96 and *Vt*, Fig. 1a) for the expression and relative abundance of 30 surface proteins.  
97 The analysis was performed in E17.5 hearts that have similar structure and cellular  
98 components to those observed in the adult. We selected 11 antibodies recognizing  
99 surface proteins from which HSA (CD24) had not been previously associated with  
100 cardiac cells. Following a sequential gating strategy (Fig. 1a; Supplementary Fig. 1),  
101 we identified 13 distinct cell populations, after exclusion of hematopoietic

102 (CD45<sup>+</sup>Ter119<sup>+</sup>) cells. Multiparametric analysis of the flow cytometry data by non-  
103 linear dimensionality reduction algorithms (Fig. 1b) created maps where cells  
104 clustered together according to phenotype (t-SNE, upper graphs) or were organized  
105 into hierarchies of related phenotypes (spanning tree, lower graphs). ICAM-1<sup>+</sup> cells  
106 (olive arrow) were predominant in the *At*, Sca-1<sup>+</sup> (blue arrow) and ALCAM<sup>+</sup> (cyan  
107 asterisk) in the *GV-AVJ* and Thy1<sup>+</sup> (green arrow) in the *Vt*. The remaining subsets  
108 were represented in all three regions, albeit at different frequencies (Fig. 1b).

109 To determine the cell identity of the newly defined populations, we analyzed their  
110 transcriptional profiles and anatomical distribution. The expression levels of 31  
111 transcripts affiliated to different cardiac lineages were analyzed in purified cells (20  
112 cells) from each subset. Unsupervised hierarchical clustering and principal  
113 component analysis (PCA) grouped the subsets in seven clusters (Fig. 2a-b;  
114 Supplementary Table 1). We observed a strong correlation between the clustering by  
115 the transcriptional profiles and the subset definition using the cell surface markers,  
116 highlighting the validity and the robustness of our approach. Cluster I encompassed  
117 CMs identified by the expression of *Nkx2-5*, *Tnnt2* and *Des*. *At* CMs (Cluster Ia)  
118 expressed *At* specific myosin, *MyI7* and *Myh6* and were phenotypically characterized  
119 by the co-expression of HSA, MCAM and ALCAM. *Vt* CMs (Cluster Ib) expressing  
120 the *Vt* myosin *MyI2* and *Myh7*, expressed HSA and MCAM, but not ALCAM (Fig. 2a-  
121 b). We also analyzed the expression and distribution of the identified proteins *in situ*  
122 (Fig. 3a). HSA<sup>+</sup>CMs identified by the characteristic striated Actinin pattern were found  
123 in both chambers (more frequent in the *At* than in the *Vt*, Fig. 3f). In cluster II cells  
124 expressed *Acta2*, indicative of their SMC affiliation, together with *Myh11* and  
125 corresponded to ALCAM<sup>+</sup> *GV-AVJ* cells found in the wall of the great vessels, co-  
126 expressing SMA protein (Fig. 2a-b; 3d). Cluster III cells expressed *Kdr*, *Flk1* and *Tek*  
127 and comprised PECAM-1<sup>+</sup> ECs and EndoCs (Fig. 2a-b), delineating the blood  
128 vessels (Fig. 3c-e) and the inner surface of the myocardium (EndoC Cluster IV cells  
129 expressed *Wt1*, *Tbx18*, *S100a4* and *Gja1*, were identified as ICAM-1<sup>+</sup> (Fig. 2a-b) and  
130 were observed in the sub-epicardial region of both chambers (Fig. 3b, e (inset #)),

131 supporting their EPDCs identity. Cluster V combined cells exhibiting a FB  
132 transcriptional profile (*Col1a1*, *Col3a1*, *Dcn*, *Twist1*, *Ddr2*, *Vcan* and *Fn1*) with the  
133 expression of *GV-AVJ* specific genes *Tbx3* together with *Isl1*, revealing a Sca-1 or  
134 HSA phenotype (Fig. 2a-b). Sca-1<sup>+</sup> (PECAM-1<sup>-</sup>) cells were detected at the insertion  
135 of great vessels (Fig. 3c, \*), whereas HSA<sup>+</sup> cells (Actinin<sup>-</sup>) were observed in the  
136 EndoC cushion mesenchyme (Fig. 3c, \*). Cluster VI corresponded to MCAM<sup>+</sup> cells  
137 expressing the SMC-associated transcript *Acta2* together with *Tbx20*, *Snai2*, *Vim*,  
138 *Fn*, *Fap* (Fig. 2a-b). Finally, in Cluster VII, Gp38<sup>+</sup>, PDGFR $\alpha$ <sup>+</sup> and Thy1<sup>+</sup> cells were  
139 grouped by the expression of a different combination of FB-related transcripts (*Ddr2*,  
140 *Col3a1*, *Dcn*, *Postn*, *Fn*, *Vim*, *Snai2*, *Tbx20*) (Fig. 2a-b). PDGFR $\alpha$  expression was  
141 associated with interstitial FBs in the myocardium (Fig. 3b), while Gp38<sup>+</sup> cells were  
142 detected in the epicardium (Fig. 3e, \*).

143 To probe the homogeneity of the cardiac subsets here defined we carried out  
144 single-cell transcriptional analyses (Supplementary Fig. 2a-b). Cell sorting was  
145 performed using the index-sorting tool that records, for each cell, the levels of  
146 expression of each phenotypic parameter (Supplementary Fig. 2c). Both the heat-  
147 map and the PCA analysis indicated that the phenotypically defined populations  
148 homogeneously co-expressed the analyzed transcripts, underscoring the strength of  
149 this combined approach (Supplementary Fig. 2a-b).

150 The ensemble of these results validated a phenotyping strategy (Fig. 1;  
151 Supplementary Table 1) that allowed the identification (Fig. 2a-b) and the prospective  
152 isolation of the major cardiac cell subsets in the fetal heart (Fig. 3g).

153

154 **Different stages of CM maturation co-exist during development.** A CM  
155 transcriptional profile (*Nkx2-5*, *Tnnt2* and *Des*) was associated with membrane HSA  
156 expression in different, but related, cell populations (Fig. 2) isolated from both heart  
157 chambers. To understand the kinetics of the newly defined populations along heart  
158 morphogenesis we performed a similar analysis at earlier developmental stages (E9.5  
159 and E13.5, Supplementary Fig. 3a, c, d). HSA<sup>+</sup>MCAM<sup>+</sup>ALCAM<sup>+</sup> (triple positive) CMs

160 were detected in all analyzed embryonic stages. However, by E17.5 most *Vt*, but not  
161 *At*, HSA<sup>+</sup> CMs had lost ALCAM expression (Supplementary Fig. 3a).  
162 HSA<sup>+</sup>MCAM<sup>+</sup>(ALCAM<sup>-</sup>) and HSA<sup>+</sup>(MCAM<sup>-</sup>ALCAM<sup>-</sup>) CMs were more frequent in the  
163 E17.5 *Vt* (Supplementary Fig. 3a, bottom right plot) and triple negative CMs (HSA<sup>-</sup>  
164 MCAM<sup>-</sup>ALCAM<sup>-</sup>), initially detected in the E13.5 *Vt*, increased to comprise most CMs at  
165 E17.5 (Fig. 4a, d; Supplementary Fig. 3a, c, d). Cell cycle analysis showed that E9.5  
166 HSA<sup>+</sup> cells, with a transcriptional profile of CM PRGs (Fig.4b), were highly  
167 proliferative (63.7% in G<sub>1</sub> and 15.9% in S/G<sub>2</sub>-M). As development proceeded, the  
168 frequency of HSA<sup>+</sup> cells decreased, and they also divided less (14.4% versus 7.66%  
169 were in S/G<sub>2</sub>-M at E13.5 and E17.5, respectively, Supplementary Fig. 3b).

170 To investigate whether the phenotypically distinct CM subsets corresponded to  
171 different stages of maturation, we included *Tnnt*<sup>23</sup> and *Cav3*<sup>12</sup> in our analysis. Surface  
172 *Cav3* expression is detected in the adult, but undetectable in most immature CMs<sup>12</sup>,  
173 while *Tnnt* is widely expressed in the CM lineage<sup>23,24</sup>. The transcriptional profile of the  
174 HSA<sup>+</sup> CMs along time (E9.5, E13.5 and E17.5) revealed that *Cav3* starts to be  
175 transcribed at E9.5 (Fig. 4b), suggesting a lineage relationship between the two CM  
176 subsets. These results highlight the progressive loss of the surface markers ALCAM,  
177 MCAM and HSA coinciding with the transcriptional expression of *Cav3* at E13.5, while  
178 at E17.5 the majority of CMs (*Tnnt*<sup>+</sup>) were HSA<sup>-</sup>MCAM<sup>-</sup>ALCAM<sup>-</sup>*Cav3*<sup>+</sup> (Fig. 4a-b).  
179 During maturation, CMs lose proliferative capacity and suffer morphological  
180 alterations leading to increased sarcomere complexity, bigger cell size and  
181 binucleation<sup>9</sup>. Cell cycle analysis of E17.5 CM subsets (HSA<sup>+</sup> and *Cav3*<sup>+</sup>) showed that  
182 HSA<sup>+</sup> cells were still proliferative (*At*: 24.4% and 20.5%; and *Vt*: 35.5% and 25.3%, in  
183 G<sub>1</sub> and S/G<sub>2</sub>-M, respectively) whereas *Cav3*<sup>+</sup>CMs were largely out of cycle (*At* 69.4%  
184 and *Vt* 78% in G<sub>0</sub>, Supplementary Fig. 3c). The stromal subsets were highly  
185 proliferative (*At*: 36.6% and 11.2%; and *Vt*: 27.6% and 11.3%, respectively in G<sub>1</sub> and  
186 S/G<sub>2</sub>-M, Supplementary Fig. 3c). Binucleated cells (4N DNA) were observed in the  
187 *Tnnt*<sup>+</sup>HSA<sup>-</sup>*Cav3*<sup>+</sup>CM population, while *Tnnt*<sup>+</sup>HSA<sup>+</sup>*Cav3*<sup>-</sup> CMs exhibited a continuum  
188 increase in DNA content, consistent with nucleic acid synthesis (Fig. 4a;

189 Supplementary Fig. 4a-b). For the first time, binucleated CMs were found during  
190 development and can be isolated using HSA<sup>-</sup>Cav3<sup>+</sup> as surface signature.

191 Our results demonstrate the coexistence of four stages of CM maturation along  
192 development (E9.5 – E17.5). Immature HSA<sup>+</sup>MCAM<sup>+</sup>ALCAM<sup>+</sup> CMs are the dominant  
193 subset in the *Af*. The expression of these markers is progressively lost such that at  
194 E17.5 only a small fraction of *Vt* CMs is still HSA<sup>+</sup>MCAM<sup>+</sup>ALCAM<sup>+</sup>, while the majority  
195 of CMs are negative for all markers, display surface Cav3 and have initiated  
196 binucleation (Fig. 4a; Supplementary Fig. 3a, c). *Af* CMs retained the expression of  
197 the three markers until later embryonic stages than their *Vt* counterparts  
198 (Supplementary Fig. 3a), consistent with the well-documented differences in CM  
199 maturation of the two chambers<sup>25</sup>.

200 Because HSA is the last surface protein to be lost before the acquisition of Cav3,  
201 we used these two markers to discriminate immature and mature CMs, respectively.  
202 Interestingly, HSA and Cav3 expression define two CMs subsets with different  
203 proliferative capacity, even after birth. Three EdU (P0, P1 and P2) injections in the  
204 neonates labeled 23% of HSA<sup>+</sup> CMs detected at P2 and 16% at P4, indicating that  
205 this CM subset maintains proliferative activity after birth (Fig. 4c). By contrast, only  
206 7% of Cav3<sup>+</sup> CMs incorporated EdU, demonstrating a lower contribution of the mature  
207 CM subset to postnatal heart growth (Fig. 4c). Other non-CM (stromal) cells showed  
208 more than 50% EdU incorporation, compatible with their high proliferative activity at  
209 this stage (Fig. 4c). The reduced frequency of Cav3<sup>+</sup> CMs at P7 detected by flow  
210 cytometry (Supplementary Fig. 3d, contour plots) reflects the sensitivity of postnatal  
211 CMs to enzymatic digestion. To overcome this, we performed a similar analysis in  
212 cells fixed before dissociation. Kinetics of HSA and Cav3 expression showed that the  
213 decrease of the former parallels an increase of the latter (Fig. 4d). At E13.5 we  
214 detected HSA<sup>+</sup> (27.3% ± 3.3%), HSA<sup>+</sup>Cav3<sup>+</sup> (10.3% ± 1.2%) and a few larger cells  
215 expressing Cav3 (10.3% ± 2.6%). At E17.5, the majority of the cells expressed Cav3  
216 (44.8% ± 6.3%), a fraction of them were binucleated (4.1% ± 0.9%) and coexisted  
217 with smaller cells that were either HSA<sup>+</sup> (4.9% ± 1.5%) or HSA<sup>+</sup>Cav3<sup>+</sup> (3.9% ± 1.9%).



218 After birth (P7), the majority of cells expressed Cav3 ( $53.1\% \pm 5.1\%$ ) and presented  
219 two (2 nuclei,  $38.7\% \pm 2.5\%$ , \*, Fig. 4d) or more ( $>2$  nuclei,  $2.5\% \pm 0\%$ , Fig. 4d)  
220 nuclei. CMs fixed prior to isolation were also analyzed by imaging flow cytometry,  
221 evidencing decreased percentage of immature HSA<sup>+</sup> CMs during development ( $57.8\%$   
222  $\pm 11.3\%$  at E13.5 and  $38.3\% \pm 3.8\%$  at E17.5) with a pronounced decline after birth  
223 ( $4.8\% \pm 2.3\%$  at P7, Fig. 4e). Importantly, HSA expression was only observed in  
224 mononucleated CMs, further associating its expression with an immature phenotype  
225 (Fig. 4e).

226 To confirm that HSA discriminates immature renewing CM, purified HSA<sup>+</sup> cells  
227 isolated from E15.5, P2 or P4 and adult ( $< 4$  weeks old) hearts were cultured for up to  
228 one week. E15.5 HSA<sup>+</sup> cells either divided ( $\sim 20\%$ ) or were contractile ( $\sim 75\%$ ) in  
229 culture, whereas no proliferation was observed in P2 or P4 cardiac cells, probably due  
230 to the rapid differentiation in culture, (Fig. 4f; Supplementary Fig. 5a; Supplementary  
231 Movie 1). Seeded P2 and P4 cells adhered and were contractile at a frequency  
232 ranging from 1:30-1:40 (Supplementary Fig. 5b), by contrast Cav3<sup>+</sup> cells, irrespective  
233 of the stage at which they were isolated, did not adhere to gelatin-coated plates and  
234 were not viable after 3 days in culture ( $< 1:1000$ ). All P2 and P4 adherent cells showed  
235 contractility (Supplementary Fig. 5b; Supplementary Movies 3, 4) whereas adult cells  
236 adhered to gelatin-coated plates, survived for a few days and expressed troponin T,  
237 but failed to contract (Supplementary Fig 5c). The non-organized pattern of troponin T  
238 observed on contractile HSA<sup>+</sup> CMs in culture reflects their immaturity (Fig. 4f) and is a  
239 feature also observed during development (Fig. 4e).

240 To show that immature CMs have the capacity to integrate cardiac tissue *in vivo*  
241 we used a previously described experimental model<sup>26</sup>, where cardiac cells are  
242 transplanted in an ectopic heart tissue previously implanted in the ear-pinna of adult  
243 mice (Supplementary Fig. 6a). Viable functional implants were identified by  
244 autonomous beating ascertained by visual inspection and by the presence of Ki67<sup>+</sup>  
245 mitotic cells (Supplementary Fig 6b). Seven days later, we transplanted either HSA<sup>+</sup>  
246 CMs or cardiac stromal cells from Ubiquitin-GFP E15.5 embryos, as control

247 (Supplementary Fig. 6a). One week after transplantation, the implants injected with  
248 HSA<sup>+</sup>GFP<sup>+</sup> CMs displayed regions of GFP<sup>+</sup> cells with the characteristic striated  
249 pattern of myocytes, that also co-expressed troponin T (Fig. 4g). Together, these  
250 results demonstrated the *in vivo* ability of immature HSA<sup>+</sup> CMs to engraft cardiac  
251 tissue and maintain viability for up to one week.

252 Overall, our results identify distinct stages of CM maturation along development  
253 based on surface marker expression. We defined two major CMs subsets: an  
254 immature subset of mononucleated cells with proliferative capacity (HSA<sup>+</sup>) that can  
255 give rise to functional CMs both *in vitro* and *in vivo*; and a mature fraction (Cav3<sup>+</sup>) with  
256 increased sarcomere complexity, binucleation and decreased proliferative capacity.

257

258 **Immature CMs persist in the adulthood and increase after injury.** To determine  
259 whether immature HSA<sup>+</sup> CMs persist in adulthood, we analyzed adult heart cell  
260 suspensions with the antibody panel defined above. CM specific transcripts (*Tnnt2*,  
261 *MyI7* and *Myh6*) were present in HSA<sup>+</sup> cells, more frequent in the *At* (*At*: 1.7% and *Vt*:  
262 0.18%, Fig. 5a), but also in HSA<sup>-</sup> cells expressing surface Cav3 (Fig. 5a;  
263 Supplementary Fig. 7b). Imaging flow cytometry analysis further confirmed a discrete  
264 subset of HSA<sup>+</sup>Actinin<sup>+</sup>CMs in adult hearts (0.6% ± 0.33%, n=3) and showed HSA  
265 expression restricted to mononucleated CMs smaller (in area and length) than HSA<sup>-</sup>  
266 CMs (Fig. 5b). The HSA<sup>+</sup> subset was considered as the most immature adult CMs  
267 because they shared cytological and phenotypic properties with embryonic CMs,  
268 although the majority also co-expressed the mature marker Cav3. Two stromal  
269 populations were also discriminated in the adult: i) a PDGFra<sup>+</sup>Sca-1<sup>+</sup>Thy1<sup>low</sup> subset of  
270 interstitial FBs compatible with a previously described stromal population<sup>27</sup> and ii)  
271 ICAM-1<sup>+</sup>Gp38<sup>+</sup>Thy1<sup>+</sup> cells, expressing *Gata4*, *Tek*, *Dcn*, *Twist1* and *Tbx18* and  
272 located in the sub-epicardial region (Supplementary Fig. 7b, c). c-kit expression  
273 previously associated with CM PRGs was exclusively found in adult PECAM-1<sup>+</sup>ECs  
274 and transcripts were also detected in ICAM-1<sup>+</sup> sub-EpiCs (Supplementary Fig. 7a-b).

275 The detection of an immature CM subset in the adult prompted us to investigate  
276 its frequency in the diseased heart. We found HSA expression largely circumscribed  
277 to the non-CM compartment in sham-operated hearts, although rare  
278 HSA<sup>+</sup>Actinin<sup>+</sup>CMs were also detected (outlined by laminin expression, Fig. 5c). Seven  
279 days after MI, and in spite of HSA expression associated to the upsurge of the  
280 hematopoietic and endothelial cells (Supplementary Fig. 7d), we detected a three-fold  
281 increase in the frequency of HSA<sup>+</sup> small round and large striated mononucleated CMs  
282 (#) ( $4.7\% \pm 3.6\%$ , \*) compared to sham-operated ( $1.7\% \pm 1.1\%$ , Fig. 5c). HSA<sup>+</sup>CMs  
283 were found in the peri-infarcted region as shown in the lower magnification image  
284 (Fig. 5c). Moreover, a small percentage of HSA<sup>+</sup>CMs (i.e. approximately one per  
285 section) were in cycle (Ki67 expression) after MI. A similar increase in HSA<sup>+</sup>CMs was  
286 evidenced after MI by imaging flow cytometry analysis of pre-fixed cells ( $1.8\% \pm$   
287  $0.3\%$ ), when compared to sham-operated hearts ( $0.6\% \pm 0.15\%$ , Fig. 5d).

288 Our results show that the cell surface signatures defined for the embryonic heart  
289 are suitable to isolate an affiliated adult population. Importantly, we identified a subset  
290 of HSA-expressing CMs, with less differentiated features than the majority of adult  
291 CMs, that cycles and increases in frequency after MI.

## 292 **Discussion**

293 The mouse heart is able to regenerate during the first days of life by proliferation of  
294 pre-existing CMs. This capacity is lost after one week of postnatal life, time from  
295 which wounded tissue is replaced by a non-functional scar<sup>28</sup>. The loss of CM mitotic  
296 activity has been attributed to the binucleation process and the complete maturation  
297 of CMs that occur after birth<sup>10,29</sup>. However, recent reports showed that CM  
298 replacement and cell division could occur, although at low rate<sup>21,22</sup>, raising the  
299 possibility that a subset of CMs in the adult might undergo mitosis. The low frequency  
300 of dividing CMs requires the identification of specific markers to isolate and  
301 characterize these rare cells. We show here that HSA marks the proliferative  
302 neonatal CM compartment that persists in the adult, retains some of their embryonic  
303 features and expands after MI.

304 Expression of *Isl1*, *Gata4*, *Mef2c* and *Tbx20* is important for CM commitment  
305 and initial stages of differentiation<sup>30-32</sup> and accordingly were used as indicative of the  
306 CM lineage. Consistent with previous reports<sup>27</sup>, we found some of these transcripts  
307 also expressed during the development of stromal cells (SMCs and FBs) indicating  
308 that, in the heart, they participate in the development of different lineages. These  
309 findings demonstrate that CMs can only be unambiguously identified by the  
310 combined expression of transcription factors, transcripts codifying structural and  
311 contractile proteins and by the absence of stromal or ECs-associated markers.

312 Several studies identified CM PRGs based on the expression of Sca-1 and c-  
313 kit<sup>14-16</sup> cell-surface proteins, which in our work were not found within the CM  
314 compartment. c-kit was only expressed in ECs (PECAM-1<sup>+</sup>), as recently shown also  
315 by others<sup>34</sup>, and in Thy1<sup>+</sup>PDGF $\alpha$ <sup>+</sup> FBs. Sca-1 expression was detected in a fraction  
316 of ECs and in a population of cells in the AV canal in the fetal heart and in the  
317 interstitium of adult myocardium<sup>15</sup>. Their spatial pattern and transcriptional profile are  
318 compatible with a FB lineage affiliation, supported by the description of Sca-1-  
319 expressing cells exhibiting a paracrine role in angiogenic stimulation, after MI<sup>15,35</sup>. At

320 E9.5 we found a HSA, ALCAM and PDGF $\alpha$  expressing population that was highly  
321 proliferative and expressed *Nkx2-5* and *Tnnt2* together with *Isl1* and *Tbx5* suggesting  
322 they represent CM PRGs<sup>36,37</sup>. These cells sharply decrease in frequency, they are  
323 only detected in the *At* after E13.5 of development and become undetectable after  
324 birth, a finding that is not compatible with the persistence of CM PRGs in the  
325 postnatal heart.

326 We identified HSA, so far never associated to heart development or maturation,  
327 as a transversal marker of immature CMs throughout life. Our analysis showed a  
328 continuum in CM maturation, which is an asynchronous process that starts during  
329 development and can be prospectively identified by the expression of distinct surface  
330 markers (Fig. 6). Immature CMs can be identified by a unique phenotype, i.e.  
331 HSA<sup>+</sup>MCAM<sup>+</sup>ALCAM<sup>+</sup>Cav3<sup>-</sup>, they progressively lose ALCAM and MCAM expression  
332 to become HSA<sup>+</sup> only. HSA<sup>+</sup> CM decrease in frequency between E17.5 and P7, but  
333 are the only CM subset that actively proliferates up to P7, they have spontaneously  
334 contractile properties in culture and are consistently mononucleated. Isolated from  
335 E15 hearts HSA<sup>+</sup> CM engrafted cardiac tissue transplanted in the ear pinna of adult  
336 mice.

337 The first signs of CM binucleation are observed around E17.5 of development in  
338 Cav3<sup>+</sup> CMs, but never in immature CMs (Tnnt<sup>+</sup>Cav3<sup>-</sup>) that decrease in frequency,  
339 coinciding with an increase in non-cycling and binucleated Cav3<sup>+</sup> CMs that compose  
340 the myocardium in adulthood. These results are in agreement with alterations  
341 endured by CMs during the first week of life, which encompass a transition from  
342 hyperplasia to hypertrophy and terminal differentiation<sup>9,10</sup>.

343 A subset (<1%) of adult CMs displayed HSA and remained mononucleated, thus  
344 resembling embryonic CM, despite expressing Cav3 at the cell surface. Our findings  
345 are in line with previous reports showing low rate of cell division (0.76%<sup>21</sup> and 0.3%-  
346 1%<sup>33</sup> per year) in small, mononucleated and diploid CMs, in the adult heart.

347 Foreseeing its therapeutic relevance, we tested whether HSA<sup>+</sup> immature CMs  
348 could respond to a pathological challenge. Interestingly, we observed an upsurge in

349 the frequency of adult mononucleated HSA<sup>+</sup> CMs following 7 days of MI (from 0.6%  
350 to 1.8%). This relative increase on HSA<sup>+</sup> CMs can be explained by proliferation,  
351 detected at low frequency in our analysis, by increased resistance of HSA<sup>+</sup>CMs to  
352 hypoxia, by re-expression of HSA or by any combination of the above. In the  
353 developing heart, low oxygen tension is found in the compact myocardial layer<sup>38</sup>  
354 precisely where immature HSA<sup>+</sup>CMs were found in this study. Likewise, an adult CM  
355 subset protected from oxidative stress in hypoxic niches and exhibiting low  
356 proliferative activity upon injury has been recently identified. Similar to HSA<sup>+</sup>CMs,  
357 these cells were mononucleated, small sized and represented around 1% of the adult  
358 myocardium<sup>33</sup>. It is thus tempting to hypothesize that the cells described in both  
359 studies correspond to the same population.

360 Although HSA<sup>+</sup> immature CMs do not proliferate sufficiently to regenerate the  
361 myocardium, they might account for the low CM turnover rate previously described in  
362 the adult<sup>21,22,39</sup> and be more amenable than binucleated CMs to respond to mitotic  
363 stimuli. Importantly, using the strategy herein described, CMs at different maturation  
364 stages can now be prospectively isolated as viable cells from the adult heart,  
365 enabling further mechanistic studies.

## 366 **METHODS**

367 **Mice.** C57BL/6 mice (Charles River) 6 - 8 week-old or timed pregnant females were  
368 used. Timed-pregnancies were generated after overnight mating. The following  
369 morning, females with vaginal plug were considered to be at E0.5.

370 All animal manipulations at i3S were approved by the Animal Ethics Committee and  
371 Direccção-Geral de Veterinária – DGAV; at Pasteur Institute according to the ethic  
372 charter approved by French Agriculture ministry and to the European Parliament  
373 Directive 2010/63/EU at both institutes.

374

375 **Mouse model of Myocardial Infarction.** MI was experimentally induced by permanent  
376 ligation of the left coronary artery as previously described<sup>40</sup>, and samples analysed 7  
377 days after injury.

378

379 **Transplantation of Ubiquitin–GFP cells in embryonic cardiac implants (ear-pinna  
380 model).** As shown in Supplementary Fig. 6a, E15.5 cardiac *Vt* from wild-type (WT)  
381 embryos were dissected and grafted in the ear-pinna of a recipient adult WT mice,  
382 under anesthesia, as previously described<sup>26</sup>. Seven days later, E15.5 hearts from  
383 Ubiquitin–GFP mice were dissociated and HSA+ immature CMs or PDGF $\alpha$ + fibroblasts  
384 (stromal cells) were sorted and directly injected into visible beating implants (10 000  
385 cells per implant). One week later, the implants were collected and tissue was  
386 processed for immunofluorescence as described below.

387

388 **Isolation of Live Cardiac Cells.** Embryonic hearts were collected under a  
389 stereomicroscope and the three anatomic heart structures (*At*, *GV-AVJ* and *Vt*) were  
390 micro-dissected. Heart tissue was minced into 1 mm<sup>3</sup> fragments and incubated during  
391 15 minutes at 37°C in the enzymatic solution: for E13.5 and E17.5 hearts, 0.2 mg/mL  
392 collagenase (Sigma) in Hank's Balanced Salt Solution with calcium and magnesium  
393 (HBSS+/, Invitrogen); for E9.5 hearts, 0.1 mg/mL collagenase in HBSS+/,; and adult  
394 heart, 0.2 mg/mL collagenase with 60 U/mL DNase I (Roche). At the end of each round  
395 of digestion, tissue fragments were re-suspended using a P1000 pipette (approximately  
396 20 times). The remaining tissue was let to sediment and the supernatant was collected  
397 in a tube containing the same volume of 10% FCS (Gibco)-HBSS+/, and kept on ice,  
398 while the digestion protocol continued. Digestion was repeated until no macroscopic  
399 tissue was detected. After digestion, cell suspensions were centrifuged 10 minutes, 290  
400 g at 4°C, re-suspended in 1% FCS-HBSS+/, and filtered with a 70  $\mu$ m mesh strainer  
401 (Fisher).

402

403 **Isolation of Fixed Cardiomyocytes.** Fixed cardiomyocytes were isolated as described  
404 by Mollova and colleagues<sup>41</sup> with some alterations. E13.5, E17.5, P7, Adult and injured  
405 (MI or Sham-operated) hearts were collected, washed in PBS (to remove blood),  
406 minced into 2 mm<sup>3</sup> pieces, flash frozen in liquid nitrogen and stored at -80°C. For cell  
407 isolation, tissue pieces were fixed in 4% paraformaldehyde at room temperature for 2  
408 hours, washed in PBS for 5 minutes and digested with 3 mg/ml collagenase type II  
409 (Worthington) in HBSS on a rotator at 37°C until no macroscopic tissue was detected.  
410 Enzyme activity was blocked with 10% FBS-HBSS (Gibco). Cell suspensions were  
411 filtered through a 100  $\mu$ m cell-strainer.

412

413 **Flow Cytometry, Cell Sorting and Imaging Flow Cytometry.** Heart cell suspensions  
414 were stained with (conjugated or non-conjugated) antibodies (20 minutes, 4°C in the  
415 dark) followed by incubation with conjugated streptavidin (10 minutes, 4°C in the dark).  
416 Whenever using a non-conjugated antibody, a sequential incubation with a secondary  
417 antibody was performed 15 minutes 4°C in the dark (see Supplementary Table 2 for the  
418 antibodies list). Propidium iodide (PI, 1 $\mu$ g/ml) was used to exclude dead cells.  
419 Intracellular proteins detection was performed after surface staining, fixation and  
420 permeabilization with the Foxp3/Transcription Factor Staining Buffer Set (eBioscience).  
421 DAPI was used to stain DNA in fixed cells (5 minutes at 4°C). Flow cytometry data was

422 acquired in a BD FACSCanto™ II and in a Sony SP6800 analyser (Sony) and analysed  
423 with the FlowJo v10.0.8 (Treestar), Kaluza 1.5 (Beckman Coulter) or R v3.2.4 software.  
424 Cells were sorted in a BD FACSAria™ III directly into 96-well plates loaded with RT-  
425 STA Reaction mix (CellsDirect™ One-Step qRT-PCR Kit, Invitrogen, according to the  
426 manufacturer's procedures) and 0.2x specific TaqMan® Assay mix (see Supplementary  
427 Table 4 for the TaqMan® assays list). For single cell sorting a control-well with 20 cells  
428 was always used. Index sorting tool on BD FACSDiva™ v8.0.1 software (BD  
429 Bioscience) was activated to track and record the fluorescence data for each parameter  
430 of each individual cell collected in a precise position of the 96-well plate. This tool  
431 allowed the post-sorting correlation of the levels of surface protein expression and the  
432 transcriptional profile (Supplementary Fig. 2c). Data were analysed with the FlowJo  
433 v10.0.8 software.

434 Fixed cardiomyocytes were re-suspended in BD Cytofix/Cytoperm  
435 Fixation/Permeabilization Kit (BD Biosciences), permeabilized in BD Perm/Wash™  
436 buffer for 15 minutes, incubated with primary antibodies for 2 hours at 4°C and with  
437 Alexa Fluor-conjugated secondary antibodies for 30 minutes at 4°C. Prior to acquisition  
438 on ImageStream, nuclei were stained with 20 µM DRAQ5 (Biostatus) and filtered with  
439 100 µm mesh. Data acquisition was performed using an ImageStreamX cytometer  
440 (Amnis). Files were collected with a cell classifier applied to the bright-field (BF)  
441 channel to capture events larger than 20µm and included BF, FITC, PEcy7 and  
442 DRAQ5 images. At least 30000 cells were analyzed for each sample and all images  
443 were captured with the 40x objective. Data analysis was performed with IDEAS  
444 software (v6.0, Amnis). For each sample only intact cardiomyocytes, selected based on  
445 Actinin and DRAQ5 signal intensity, were considered for subsequent analysis. For the  
446 morphometric analysis we applied a morphology mask to the BF channel and for  
447 assessment of the number of nuclei/cell we used the DRAQ5 images.

448  
449 **Culture of HSA+ cells and Live-cell imaging.** E15.5, P2, P4 and adult cardiac cells  
450 were isolated as above and HSA<sup>+</sup> cells were sorted following the gating strategy in  
451 Supplementary Fig. 5a-b. For the neonatal and adult cells, 20 mM 2,3-Butanedione  
452 monoxime (BDM, Sigma) was added throughout the isolation procedure<sup>42</sup>. HSA<sup>+</sup> cells  
453 were plated in 0.1% collagen (Life Technologies) for E15.5 or fibronectin/gelatin for  
454 postnatal cells, coated ibidi plates and cultured for one week in high glucose Iscove's  
455 Modified Dulbecco's media (Gibco, Life Technology) supplemented with 20%FBS, 1X  
456 penicillin/streptomycin (Gibco, Life Technologies), 1X L-glutamine (Gibco, Life  
457 Technologies), 50 µg/mL µg/ml ascorbic acid, and 1.5x10<sup>-4</sup>M 1-thioglycerol (Sigma-  
458 Aldrich), as previously described<sup>4</sup>. Adult cardiac cells were incubated at 37°C in 3%O<sub>2</sub>.  
459 Live-cell imaging was performed on a temperature-controlled Zeiss Axiovert 200M  
460 microscope equipped with a CoolSnap HQ (Roper) camera. Sample position was  
461 controlled by a X-Y motorized stage and images were acquired every 15 min using an  
462 A-Plan 20x/0.30 objective for 48 hours.

463  
464 **Histological Processing and Immunofluorescence Staining.** Embryonic and adult  
465 (MI and sham-operated) hearts were fixed in 0.2% paraformaldehyde (Merk) overnight  
466 at 4°C, dehydrated in a sucrose gradient (4% followed of 15%), embedded in gelatine  
467 and frozen. Tissue cryo-sections (4 µm thick) were blocked with either 4% FBS-1%  
468 BSA blocking solution or Vector M.O.M.™ basic kit (Vector Laboratories), depending  
469 on the specific conditions detailed on Supplementary Table 3. Tissue sections were  
470 incubated with primary antibodies overnight at 4°C, followed by 1-hour incubation with  
471 Alexa Fluor-conjugated secondary antibodies (Invitrogen, see Supplementary Table 3  
472 for the antibodies list). Slides were mounted and nuclei counterstained with aqueous  
473 mounting medium with DAPI (Vector Labs). Representative high-resolution images  
474 were acquired for each heart structure (*At*, *GV-AVJ* and *Vt*) at 40x magnification in a  
475 confocal microscope (Leica SP5II, Leica). Whole heart acquisitions were obtained using  
476 the high-content imaging system (IN Cell Analyzer 2000, GE Healthcare).

477 Isolated fixed cardiomyocytes were re-suspended in 10% FBS-PBS and spun onto  
478 superfrost slides in a cytocentrifuge (Shandon). Cytospins were incubated with primary



479 antibodies overnight at 4°C, followed by 1-hour incubation with Alexa Fluor-conjugated  
480 secondary antibodies. Acquired images were edited and quantified using the Image J  
481 software v1.51d software.

482

483 **Gene Expression Analysis.** Sorted cells in RT-STA Reaction mix from the  
484 CellsDirect™ One-Step qRT-PCR Kit (Life Technologies) were kept at -80°C at least  
485 overnight before reverse transcription and specific target pre-amplification (20 cycles for  
486 single cells and 18 cycles for 20 cells). Pre-amplified samples were subjected to qPCR  
487 (see Supplementary Table 4 for Taqman® assays list) as previously described<sup>43</sup>.

488

489 **Bioinformatic Analysis.** Flow cytometry data analysis was performed in FCS files of  
490 live CD45<sup>+</sup>Ter119<sup>-</sup>CD31<sup>-</sup> cell fraction using R package flowCore from R v3.2.4 revised  
491 (2016-03-16 r70336) and the interface R Studio v0.99.467<sup>44</sup>. Subsequently gating, as  
492 described in Fig. 1 and in Supplementary Fig. 1, was used to define each population.  
493 Map clustering of the flow cytometry data was performed using custom R scripts from R  
494 package t-SNE to dimensionality reduction – t-SNE<sup>45</sup> and Bioconductor.org package  
495 flowSOM to visualize Self-Organizing and Minimal Spanning Trees (Spanning  
496 Trees)<sup>46,47</sup>.

497 Gene expression raw data (BioMark™, Fluidigm) of sorted cells at the population level  
498 was normalized with HPRT, and data is presented in 2<sup>-ΔCt</sup>. Single cell gene  
499 expression analysis was performed in cells that expressed at least one of three  
500 housekeeping genes (*Hprt*, *Gapdh*, or *Actb*) and Ct values were used to the following  
501 analysis. A Ct value of 21 was the maximum value considered as expressed gene and  
502 the background (i.e. non-detected) Ct value was 38. qPCR data was processed with the  
503 ©QLUCORE (Qlucore AB 2008 – 2015, Lund, Sweden) software and was displayed in  
504 uncentered Pearson's correlation unsupervised hierarchical clustering and Principal  
505 component analysis (PCA) either for surface phenotype or transcripts.

506

507 **Statistical Analysis.** All results are shown as mean ± standard deviation (SD).  
508 Statistical significance was determined using the t-Student test, except when comparing  
509 the frequency of HSA<sup>+</sup> CMs from E13.5 to P7 (one-way ANOVA followed by Tukey  
510 Test). The statistical analysis of the data was performed using SigmaPlot software  
511 ( $p < 0.05$  was considered statistically significant) or ©QLUCORE (Qlucore AB 2008 –  
512 2015, Lund, Sweden) software for the multidimensional analysis of multiplex qPCR  
513 (two-way ANOVA,  $p = 0.007$ ,  $q = 0.01$ ).

514

515

516

517

518

519

## 520 References

- 521 1 Buckingham, M., Meilhac, S. & Zaffran, S. Building the mammalian heart from  
522 two sources of myocardial cells. *Nat Rev Genet* **6**, 826-835,  
523 doi:10.1038/nrg1710 (2005).
- 524 2 Lyons, I. *et al.* Myogenic and morphogenetic defects in the heart tubes of  
525 murine embryos lacking the homeo box gene Nkx2-5. *Genes Dev* **9**, 1654-  
526 1666 (1995).
- 527 3 Kelly, R. G., Brown, N. A. & Buckingham, M. E. The arterial pole of the mouse  
528 heart forms from Fgf10-expressing cells in pharyngeal mesoderm. *Dev Cell*  
529 **1**, 435-440 (2001).
- 530 4 Wu, S. M. *et al.* Developmental Origin of a Bipotential Myocardial and  
531 Smooth Muscle Cell Precursor in the Mammalian Heart. *Cell* **127**, 1137-1150  
532 (2006).
- 533 5 Cai, C. L. *et al.* A myocardial lineage derives from Tbx18 epicardial cells.  
534 *Nature* **454**, 104-108, doi:10.1038/nature06969 (2008).
- 535 6 Dettman, R. W., Denetclaw, W., Jr., Ordahl, C. P. & Bristow, J. Common  
536 epicardial origin of coronary vascular smooth muscle, perivascular  
537 fibroblasts, and intermyocardial fibroblasts in the avian heart. *Dev Biol* **193**,  
538 169-181, doi:10.1006/dbio.1997.8801 (1998).
- 539 7 de Boer, B. A., van den Berg, G., de Boer, P. A., Moorman, A. F. & Ruijter, J. M.  
540 Growth of the developing mouse heart: an interactive qualitative and  
541 quantitative 3D atlas. *Dev Biol* **368**, 203-213,  
542 doi:10.1016/j.ydbio.2012.05.001 (2012).
- 543 8 Sedmera, D. *et al.* Spatiotemporal pattern of commitment to slowed  
544 proliferation in the embryonic mouse heart indicates progressive  
545 differentiation of the cardiac conduction system. *Anat Rec A Discov Mol Cell*  
546 *Evol Biol* **274**, 773-777, doi:10.1002/ar.a.10085 (2003).
- 547 9 Li, F., Wang, X., Capasso, J. M. & Gerdes, A. M. Rapid Transition of Cardiac  
548 Myocytes from Hyperplasia to Hypertrophy During Postnatal Development.  
549 *Journal of Molecular and Cellular Cardiology* **28**, 1737-1746,  
550 doi:<http://dx.doi.org/10.1006/jmcc.1996.0163> (1996).
- 551 10 Soonpaa, M. H., Kim, K. K., Pajak, L., Franklin, M. & Field, L. J. Cardiomyocyte  
552 DNA synthesis and binucleation during murine development. *Am J Physiol*  
553 **271**, H2183-2189 (1996).
- 554 11 Dubois, N. C. *et al.* SIRPA is a specific cell-surface marker for isolating  
555 cardiomyocytes derived from human pluripotent stem cells. *Nat Biotechnol*  
556 **29**, 1011-1018, doi:nbt.2005 [pii]  
557 10.1038/nbt.2005 (2011).
- 558 12 Parton, R. G., Way, M., Zorzi, N. & Stang, E. Caveolin-3 associates with  
559 developing T-tubules during muscle differentiation. *J Cell Biol* **136**, 137-154  
560 (1997).
- 561 13 Ponten, A. *et al.* FACS-based isolation, propagation and characterization of  
562 mouse embryonic cardiomyocytes based on VCAM-1 surface marker  
563 expression. *PLoS One* **8**, e82403, doi:10.1371/journal.pone.0082403 (2013).
- 564 14 Oh, H. *et al.* Cardiac progenitor cells from adult myocardium: Homing,  
565 differentiation, and fusion after infarction. *Proc Natl Acad Sci U S A* **100**,  
566 12313-12318, doi:10.1073/pnas.2132126100 (2003).

- 567 15 Valente, M., Nascimento, D. S., Cumano, A. & Pinto-do, O. P. Sca-1+ cardiac  
568 progenitor cells and heart-making: a critical synopsis. *Stem Cells Dev* **23**,  
569 2263-2273, doi:10.1089/scd.2014.0197 (2014).
- 570 16 Beltrami, A. P. *et al.* Adult Cardiac Stem Cells Are Multipotent and Support  
571 Myocardial Regeneration. *Cell* **114**, 763-776 (2003).
- 572 17 Goldsmith, E. C. *et al.* Organization of fibroblasts in the heart. *Dev Dyn* **230**,  
573 787-794, doi:10.1002/dvdy.20095 (2004).
- 574 18 Hudon-David, F., Bouzeghrane, F., Couture, P. & Thibault, G. Thy-1  
575 expression by cardiac fibroblasts: lack of association with myofibroblast  
576 contractile markers. *J Mol Cell Cardiol* **42**, 991-1000,  
577 doi:10.1016/j.yjmcc.2007.02.009 (2007).
- 578 19 Hellstrom, M., Kalen, M., Lindahl, P., Abramsson, A. & Betsholtz, C. Role of  
579 PDGF-B and PDGFR-beta in recruitment of vascular smooth muscle cells and  
580 pericytes during embryonic blood vessel formation in the mouse.  
581 *Development* **126**, 3047-3055 (1999).
- 582 20 Albelda, S. M., Muller, W. A., Buck, C. A. & Newman, P. J. Molecular and  
583 cellular properties of PECAM-1 (endoCAM/CD31): a novel vascular cell-cell  
584 adhesion molecule. *J Cell Biol* **114**, 1059-1068 (1991).
- 585 21 Senyo, S. E. *et al.* Mammalian heart renewal by pre-existing cardiomyocytes.  
586 *Nature* **493**, 433-436, doi:10.1038/nature11682 (2013).
- 587 22 Ali, S. R. *et al.* Existing cardiomyocytes generate cardiomyocytes at a low  
588 rate after birth in mice. *Proc Natl Acad Sci U S A* **111**, 8850-8855,  
589 doi:10.1073/pnas.1408233111 (2014).
- 590 23 Jin, J. P., Zhang, Z. & Bautista, J. A. Isoform diversity, regulation, and  
591 functional adaptation of troponin and calponin. *Crit Rev Eukaryot Gene Expr*  
592 **18**, 93-124 (2008).
- 593 24 Jain, R. *et al.* HEART DEVELOPMENT. Integration of Bmp and Wnt signaling  
594 by Hopx specifies commitment of cardiomyoblasts. *Science* **348**, aaa6071,  
595 doi:10.1126/science.aaa6071 (2015).
- 596 25 Bootman, M. D., Smyrniak, I., Thul, R., Coombes, S. & Roderick, H. L. Atrial  
597 cardiomyocyte calcium signalling. *Biochim Biophys Acta* **1813**, 922-934,  
598 doi:10.1016/j.bbamcr.2011.01.030 (2011).
- 599 26 Ardehali, R. *et al.* Prospective isolation of human embryonic stem cell-  
600 derived cardiovascular progenitors that integrate into human fetal heart  
601 tissue. *Proc Natl Acad Sci U S A* **110**, 3405-3410,  
602 doi:10.1073/pnas.1220832110 (2013).
- 603 27 Furtado, M. B. *et al.* Cardiogenic genes expressed in cardiac fibroblasts  
604 contribute to heart development and repair. *Circ Res* **114**, 1422-1434,  
605 doi:10.1161/CIRCRESAHA.114.302530 (2014).
- 606 28 Porrello, E. R. *et al.* Transient regenerative potential of the neonatal mouse  
607 heart. *Science* **331**, 1078-1080, doi:10.1126/science.1200708 (2011).
- 608 29 Walsh, S., Pontén, A., Fleischmann, B. K. & Jovinge, S. Cardiomyocyte cell  
609 cycle control and growth estimation in vivo—an analysis based on  
610 cardiomyocyte nuclei. *Cardiovascular Research* **86**, 365-373,  
611 doi:10.1093/cvr/cvq005 (2010).
- 612 30 Cai, C. L. *et al.* T-box genes coordinate regional rates of proliferation and  
613 regional specification during cardiogenesis. *Development* **132**, 2475-2487,  
614 doi:10.1242/dev.01832 (2005).
- 615 31 Edmondson, D. G., Lyons, G. E., Martin, J. F. & Olson, E. N. Mef2 gene  
616 expression marks the cardiac and skeletal muscle lineages during mouse  
617 embryogenesis. *Development* **120**, 1251-1263 (1994).

- 618 32 Harvey, R. P. NK-2Homeobox Genes and Heart Development. *Developmental*  
619 *Biology* **178**, 203-216 (1996).
- 620 33 Kimura, W. *et al.* Hypoxia fate mapping identifies cycling cardiomyocytes in  
621 the adult heart. *Nature* **523**, 226-230, doi:10.1038/nature14582 (2015).
- 622 34 Sultana, N. *et al.* Resident c-kit(+) cells in the heart are not cardiac stem  
623 cells. *Nat Commun* **6**, 8701, doi:10.1038/ncomms9701 (2015).
- 624 35 Freire, A. G. *et al.* Stable phenotype and function of immortalized Lin-Sca-1+  
625 cardiac progenitor cells in long-term culture: a step closer to  
626 standardization. *Stem Cells Dev* **23**, 1012-1026, doi:10.1089/scd.2013.0305  
627 (2014).
- 628 36 Cai, C. L. *et al.* Isl1 identifies a cardiac progenitor population that  
629 proliferates prior to differentiation and contributes a majority of cells to the  
630 heart. *Dev Cell* **5**, 877-889 (2003).
- 631 37 Kattman, S. J., Adler, E. D. & Keller, G. M. Specification of multipotential  
632 cardiovascular progenitor cells during embryonic stem cell differentiation  
633 and embryonic development. *Trends Cardiovasc Med* **17**, 240-246,  
634 doi:10.1016/j.tcm.2007.08.004 (2007).
- 635 38 Guimaraes-Camboa, N. *et al.* HIF1alpha Represses Cell Stress Pathways to  
636 Allow Proliferation of Hypoxic Fetal Cardiomyocytes. *Dev Cell* **33**, 507-521,  
637 doi:10.1016/j.devcel.2015.04.021 (2015).
- 638 39 Bergmann, O. *et al.* Evidence for Cardiomyocyte Renewal in Humans. *Science*  
639 **324**, 98-102, doi:10.1126/science.1164680 (2009).
- 640 40 Nascimento, D. S. *et al.* MIQuant - Semi-Automation of Infarct Size  
641 Assessment in Models of Cardiac Ischemic Injury. *PLoS ONE* **6**, e25045  
642 (2011).
- 643 41 Mollova, M. *et al.* Cardiomyocyte proliferation contributes to heart growth in  
644 young humans. *Proc Natl Acad Sci U S A* **110**, 1446-1451,  
645 doi:10.1073/pnas.1214608110  
646 1214608110 [pii] (2013).
- 647 42 Ehler, E., Moore-Morris, T. & Lange, S. Isolation and culture of neonatal  
648 mouse cardiomyocytes. *J Vis Exp*, doi:10.3791/50154 (2013).
- 649 43 Chea, S. *et al.* Single-Cell Gene Expression Analyses Reveal Heterogeneous  
650 Responsiveness of Fetal Innate Lymphoid Progenitors to Notch Signaling.  
651 *Cell Rep* **14**, 1500-1516, doi:10.1016/j.celrep.2016.01.015 (2016).
- 652 44 R: A Language and Environment for Statistical Computing (R Foundation for  
653 Statistical Computing, Vienna, Austria, 2016).
- 654 45 Maaten, L. J. P. v. d. in *International Conference on Learning Representations*.  
655 46 Van Gassen, S. *et al.* FlowSOM: Using self-organizing maps for visualization  
656 and interpretation of cytometry data. *Cytometry A* **87**, 636-645,  
657 doi:10.1002/cyto.a.22625 (2015).
- 658 47 Saeys, Y., Gassen, S. V. & Lambrecht, B. N. Computational flow cytometry:  
659 helping to make sense of high-dimensional immunology data. *Nat Rev*  
660 *Immunol* **16**, 449-462, doi:10.1038/nri.2016.56 (2016).
- 661  
662

663 **Acknowledgments**

664 We thank the members of P.P.O. and A.C. laboratories for fruitful discussions. We  
665 are grateful to the i3S Animal Facility, Advanced Flow Cytometry, Unit b.IMAGE,  
666 Advanced Light Microscopy Unit and to the Pasteur Institute Flow Cytometry Core  
667 facility, including Sony SP6800 implementation (K. Futamura and C. Ait-Mansour), D.  
668 Montarra's and S. Meilhac's lab, P. Vieira, A. Bandeira, H. Maiato and specially to P.  
669 Pereira for critical reading of the manuscript; M. Rujano, Z. Garcia, D. Sassoon, S.  
670 Tajbakhsh; P. Bousso for the ubiquitin-GFP reporter mice; S. Chea and V. Rouilly for  
671 help in the analysis of single cell transcriptional data.

672 This work was financed by European Structural and Investment Funds (ESIF), under  
673 Lisbon Portugal Regional Operational Program and National Funds through FCT-  
674 Foundation for Science and Technology under project POCI-01-0145-FEDER-016385  
675 to PPO; by Pasteur Institute, INSERM, ANR (grant Twothyme), REVIVE Future  
676 Investment Program and Pasteur-Weizmann Foundation through grants to AC. MV  
677 (SFRH/BD/74218/2010) and TPR (SFRH/BPD/80588/2011) were supported by FCT,  
678 and PPO was recipient of an invited scientist grant by Institut Pasteur, Paris, France  
679

680 **Auth or contributions**

681 M.V., T.P.R., D.S.N., A.C. and P.P.O. designed the project; M.V., T.P.R., D.S.N.,  
682 O.B.-D. and A.C. performed experiments and analyzed data; B.D. contributed new  
683 analytic tools; and M.V., T.P.R., D.S.N., A.C. and P.P.O. wrote the paper.  
684

685 **Additional information**

686 **Supplementary Information:** Supplementary Information accompanies this paper at  
687

688 **Competing interests:** The authors declare no competing interests.  
689

690 **Reprints and permission** information is available online at  
691

692 Correspondence and requests for materials should be addressed to A.C. (email:  
693 [ana.cumano@pasteur.fr](mailto:ana.cumano@pasteur.fr)) and to P.P.O. ([perpetua@ineb.up.pt](mailto:perpetua@ineb.up.pt))

694 **Figure Legends:**

695 **Fig. 1** Cell subsets in fetal heart. **a.** Dissected cardiac regions in E17.5 fetal heart: *At*, *GV-AVJ* and *Vt*.

696 Scale bar: 1 mm. Flow cytometry dot plots of *At* CD45<sup>-</sup>Ter119<sup>-</sup> cells showing the expression of

697 PECAM-1, ICAM-1, Sca-1, Gp38, Thy1, HSA, PDGFr $\alpha$ , ALCAM and MCAM (n=10). **b.** t-SNE (upper

698 graphs) and Spanning Tree (lower graphs) analyses applied to the populations defined in A. Each point

699 represents a cell and colors represent surface signatures (see Supplementary Fig. 1). Marker

700 expression is represented by a color code: red arrows HSA, MCAM and ALCAM, cyan arrows MCAM,

701 green asterisks PDGFr $\alpha$ , olive arrows ICAM-1, green arrows Thy1, blue asterisks HSA, blue arrow

702 Sca-1, cyan asterisk ALCAM and black arrows none of the above. Colors correspond to populations

703 as in **a.** and number of dots denotes relative size of the populations. Multiple colors in the same node

704 represent co-expression. *B.* *At* | Atria; *GV-AVJ* | Great Vessels-Atrioventricular Junction; *Vt* |

705 Ventricles.

706

707 **Fig. 2** Transcriptional profiles assign cardiac lineages to phenotypes. **a.** Unsupervised hierarchical

708 clustering of multiplex qRT-PCR data (20 sorted cells, n=3) in E17.5 hearts (acronyms and color-code

709 as in Supplementary Fig. 1). Differential expressed genes among clusters assign a cell type to each

710 surface signature. Statistical significance was determine using two-way ANOVA test;  $p=0.007$ ,  $q=0.01$

711 (Table 1). **b.** Principal component analysis (PCA) of the transcriptional profile in **a.** clustered by

712 surface phenotype (left graph), by gene expression (middle graph) or by cardiac cell type defined

713 by gene expression (right graph). Cluster Ia – *At* CMs, Cluster Ib – *Vt* CMs, Cluster II and VI –

714 SMCs, Cluster III – ECs, Cluster IV – EPDCs, Cluster V – Cushions *GV-AVJ* FBs and Cluster VII

715 FBs. *At* CMs | Atria Cardiomyocytes; *Vt* CMs | Ventricles Cardiomyocytes; ECs | Endothelial Cells;

716 EPDCs | Epicardial-Derived Cells; SMCs | Smooth Muscle Cells; FBs | interstitial Fibroblasts; *GV-AVJ*

717 FBs | Great Vessels-Atrioventricular Junction Fibroblasts.

718

719 **Fig. 3** Spatial distribution of cardiac populations. **a.** Coronal view of E17.5 heart section: Actinin (red),

720 nuclear content (DAPI, blue). Scale bar: 50  $\mu$ m. **b.** Interstitial FBs (PDGFr $\alpha$ <sup>+</sup> cells). **c.** *GV-AVJ* FBs (\*,

721 Sca-1<sup>+</sup>PECAM-1<sup>-</sup> or HSA<sup>+</sup>Actinin<sup>-</sup> cells); **d.** SMCs (ALCAM<sup>+</sup>SMA<sup>+</sup> cells, inset); **e.** EpiCs (two left panels,

722 Gp38<sup>+</sup> cells, \*); EPDCs (right panel, ICAM-1<sup>+</sup> PECAM-1<sup>-</sup>, Inset #.; ECs, ICAM-1<sup>+</sup>PECAM-1<sup>+</sup> cells in inset

723 §.; **f.** CMs (HSA<sup>+</sup>Actinin<sup>+</sup>, \*; stromal cells, HSA<sup>+</sup>Actinin<sup>-</sup> cells in the *Vt* #). Scale bar: 20  $\mu$ m, insets: 10

724  $\mu$ m. **g.** Fetal heart representation with the spatial distribution of the newly defined cardiac populations.

725 Color-code as in Supplementary Fig. 1. CMs | Cardiomyocytes; EpiCs | Epicardial Cells; EPDCs |

726 Epicardial-Derived Cells; ECs | Endothelial Cells; SMCs | Smooth Muscle Cells; FBs | interstitial

727 Fibroblasts; GV-AVJ FBs | Great Vessels-Atrioventricular Junction Fibroblasts; *At* | Atria; *Vt* | Ventricles;  
728 AVJ | Atrioventricular Junction.

729

730 **Fig. 4** Expression of HSA and Cav3 identify two cardiomyocyte subsets. **a.** E17.5 whole heart  
731 suspensions (n=2). HSA<sup>+</sup>MCAM<sup>+</sup>ALCAM<sup>+/-</sup>Cav3<sup>-</sup> (light pink, upper panels) and HSA<sup>-</sup>MCAM<sup>-</sup>ALCAM<sup>-</sup>  
732 Cav3<sup>+</sup> (red, lower panels) analyzed for DNA content. **b.** Unsupervised hierarchical clustering the  
733 HSA<sup>+</sup>CMs (single cell multiplex qRT-PCR data, at different E stages). **c.** EdU incorporation in CD45<sup>-</sup>  
734 TER119<sup>-</sup>PECAM-1<sup>-</sup>ICAM-1<sup>-</sup>Sca-1<sup>-</sup>, PDGFR $\alpha$ <sup>+</sup> stromal cells (left), HSA<sup>+</sup> CMs (middle) and Cav3<sup>+</sup> CMs  
735 (right) in P2 (top) and P4 (bottom) hearts (n=2). **d.** HSA and Cav3 expression in E13.5, E17.5 and P7  
736 cardiac cells. Flow cytometry (left panels, n=2) and cytopsin (right panels, n=3, 300 cells analyzed in  
737 each). Histograms correspond to cytology data. Scale bar: 20  $\mu$ m. **e.** HSA expression in CMs (Actinin<sup>+</sup>)  
738 by imaging flow cytometry. Scale bar: 10  $\mu$ m. Frequency of HSA<sup>+</sup> CMs at E13.5, E17.5 and P7 (n=3,  
739 59397, 67306 and 7088 total cells analyzed for E13.5, E17.5 and P7, respectively). **f.** Cultured HSA<sup>+</sup>  
740 E15.5 CMs (time lapse, hr: min, upper panels, MS1, MS2), HSA<sup>+</sup> P2 and P4 CMs (middle panels and  
741 MS3, MS4). Scale bar: 10  $\mu$ m (n=3). Immunofluorescence of cultured (72 hours) P2 CMs. Troponin T (in  
742 red) and GFP (Ubiquitin-GFP cells, lower panels). **g.** Immunofluorescence of cardiac implants  
743 transplanted with Ub-GFP<sup>+</sup> E15.5 HSA<sup>+</sup> CMs (n=3). Cardiac troponin T (red), GFP (donor cells), Ki67  
744 (white) and DAPI (nuclei, blue). Scale bar: 50  $\mu$ m. Insets show higher magnification of the region within  
745 the dashed white rectangle (right panels). \* p<0.05. CMs | Cardiomyocytes; *At* | atria; *Vt* | Ventricles.

746

747 **Fig. 5** Immature cardiomyocytes in the adult heart respond to injury. **a.** Flow cytometry frequency (top)  
748 and gene expression of adult HSA<sup>+</sup> single cells (bottom) (n=2). **b.** Image flow cytometry of HSA<sup>-</sup> and  
749 HSA<sup>+</sup> adult CMs. Cells in the top panels show low levels of autofluorescence in the green channel.  
750 Histogram bar graphs show length and area of HSA<sup>+</sup> and HSA<sup>-</sup>CMs (n=3, 9415 cells). **c.**  
751 Immunofluorescence of the peri-infarcted myocardium of MI (left panels) or sham-operated animals  
752 (right panel). HSA<sup>+</sup>CMs (arrowhead), small round (\*) or large striated HSA<sup>+</sup>CMs (#) Ki67<sup>+</sup>HSA<sup>+</sup>CMs  
753 (arrowhead). Frequency of HSA<sup>+</sup>CMs (Actinin<sup>+</sup>) per heart after MI (49 sections across 3 hearts) and in  
754 sham-operated animals (30 sections across 3 hearts). \* p<0.05. Scale bar: 20  $\mu$ m, insets 10  $\mu$ m. **d.**  
755 Imaging flow cytometry of CMs in MI and sham-operated hearts. Frequency of HSA<sup>+</sup>CMs (Actinin<sup>+</sup>)  
756 isolated from sham-operated (n=3, 43461 cells analyzed) and MI hearts (n=3, 35189 cells analyzed).  
757 Scale bar: 10  $\mu$ m. \*\* p<0.005. CMs | Cardiomyocytes; MI | Myocardial infarction; *At* | Atria; *Vt* |  
758 Ventricles.

759

760 **Fig. 6.** HSA is as a transversal marker of immature CMs during life. The combined use of surface marker  
761 analysis with single cell transcriptional profiling allowed identifying different subsets of CMs (expressing



762 *Nkx2.5*, *TnnT2*, *Des*, *Isl1*, *Gata4*, *Mef2c* and *Tbx20*) in the murine heart. Less mature CMs (Tnnt<sup>+</sup>Cav3<sup>-</sup>)  
763 express HSA, MCAM and ALCAM and progressively lose these markers, maintaining the expression of  
764 HSA. Cav3 transcripts are, however, detected in all CMs subsets. A subset of CM PRGs  
765 (HSA<sup>+</sup>ALCAM<sup>+</sup>PDGFr $\alpha$ <sup>+</sup>) was found at E9.5 and persisted in the atria of E13.5 and E17.5 hearts (not  
766 represented). HSA<sup>+</sup> CMs dramatically decrease around birth, coinciding with an increase in quiescent  
767 and binucleated Cav3<sup>+</sup> cells, firstly detected at E17.5. The adult myocardium is composed by two main  
768 CMs subsets: mononucleated HSA<sup>+</sup>Cav3<sup>+</sup> and mono- and bi- nucleated Cav3<sup>+</sup> CMs. Upon MI, HSA<sup>+</sup>  
769 CMs frequency increases and a small percentage of these is proliferating. Throughout cardiac  
770 maturation, proliferative CMs (C) were only detected within the HSA<sup>+</sup> compartment. Detailed information  
771 can be found in the text.

# Fig. 1

a

E17.5

CD45<sup>-</sup> / Ter119<sup>-</sup>

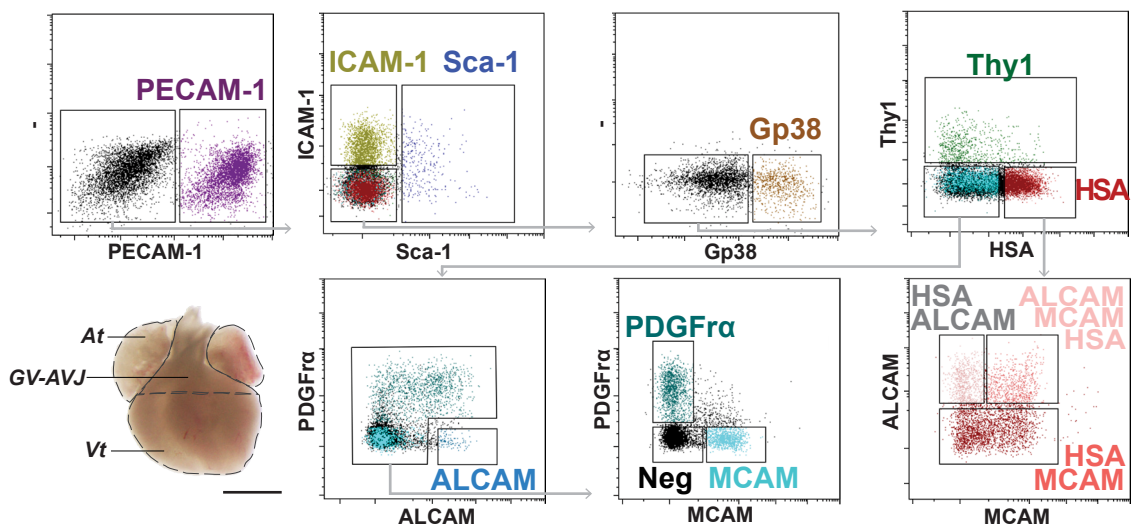

b

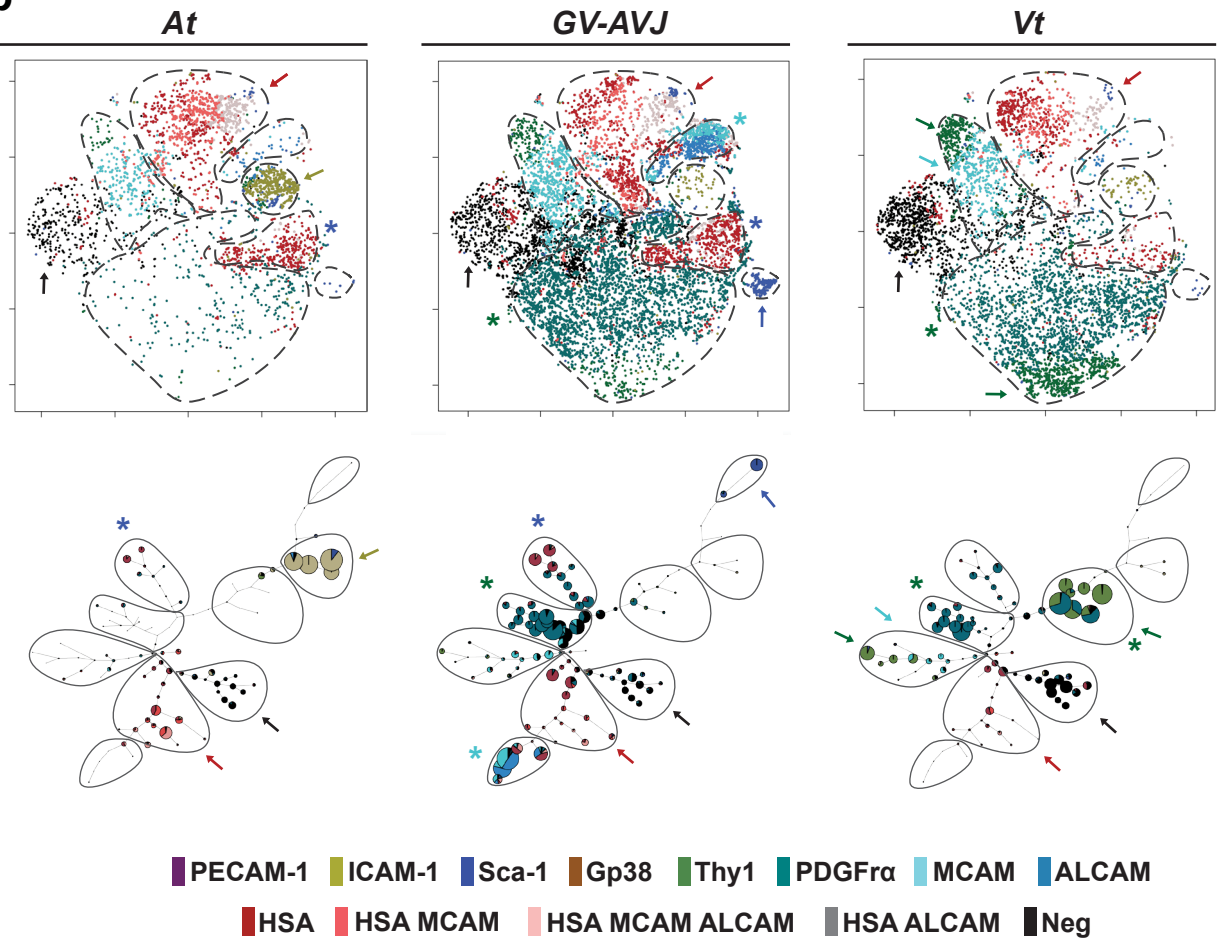

## Fig. 2

a

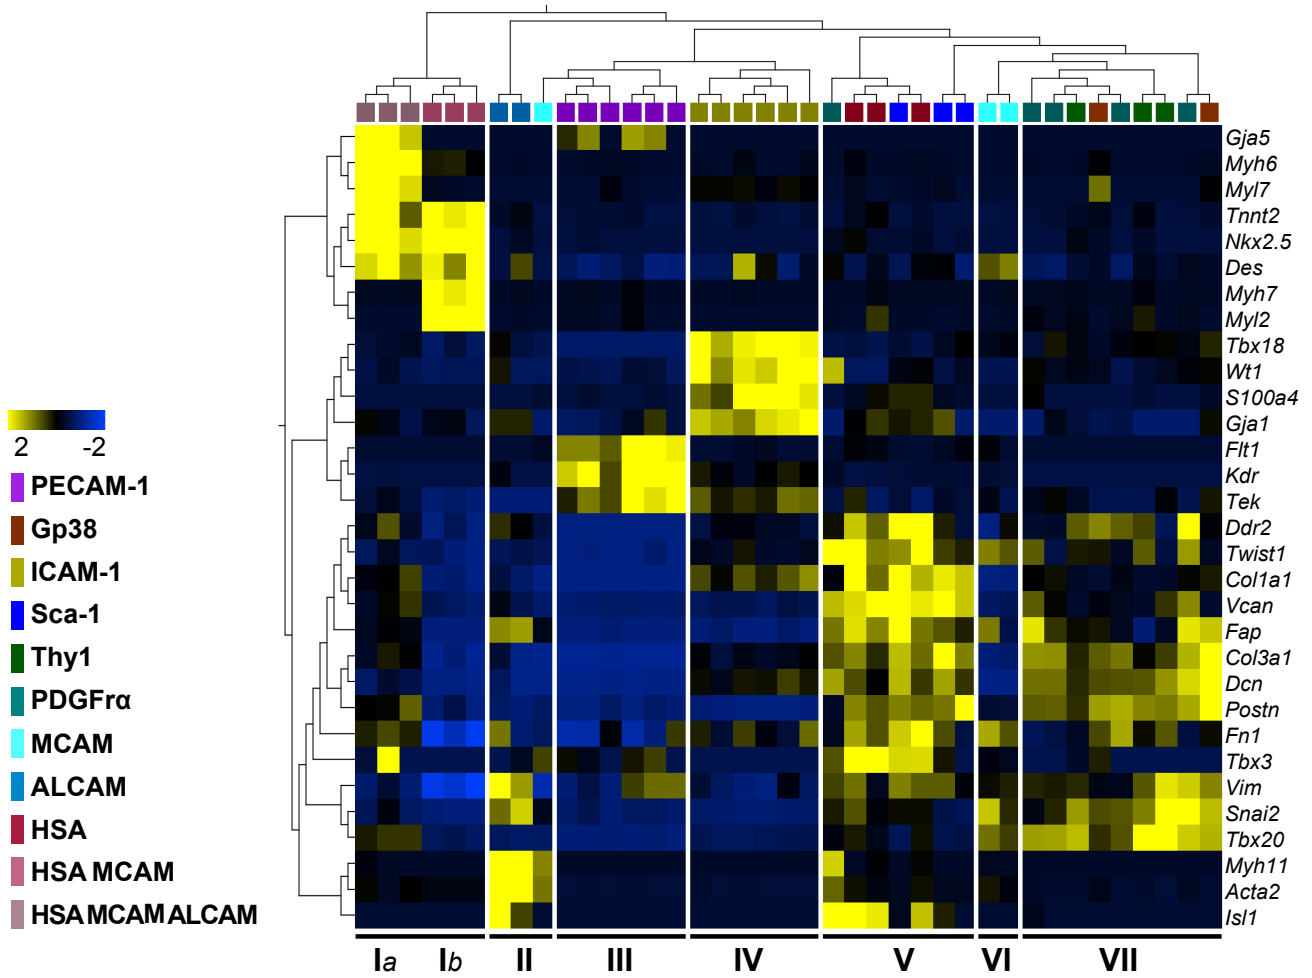

b

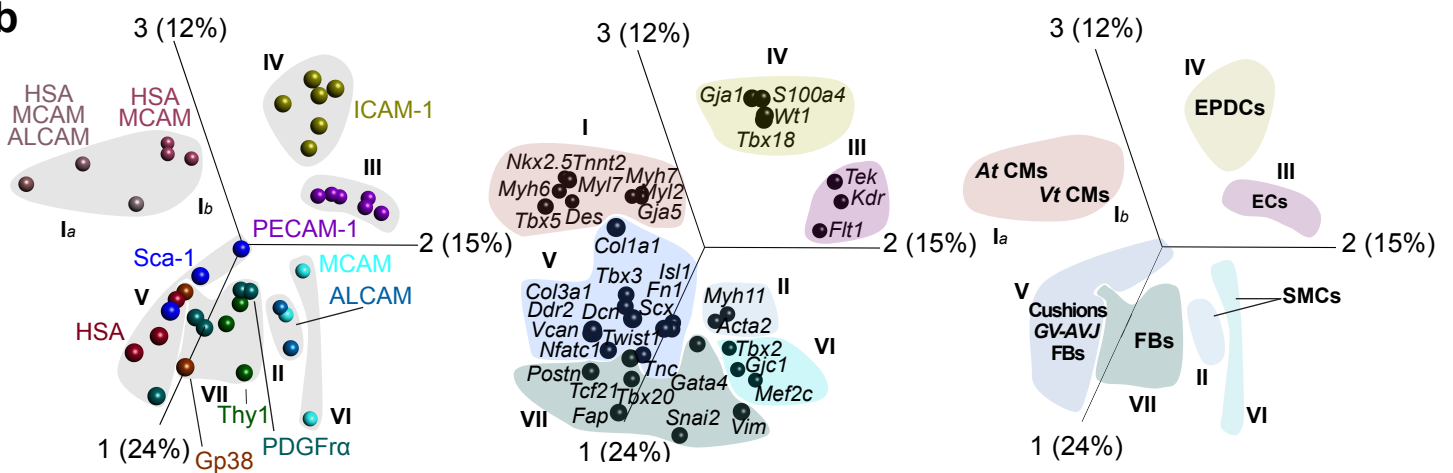

**Fig. 3**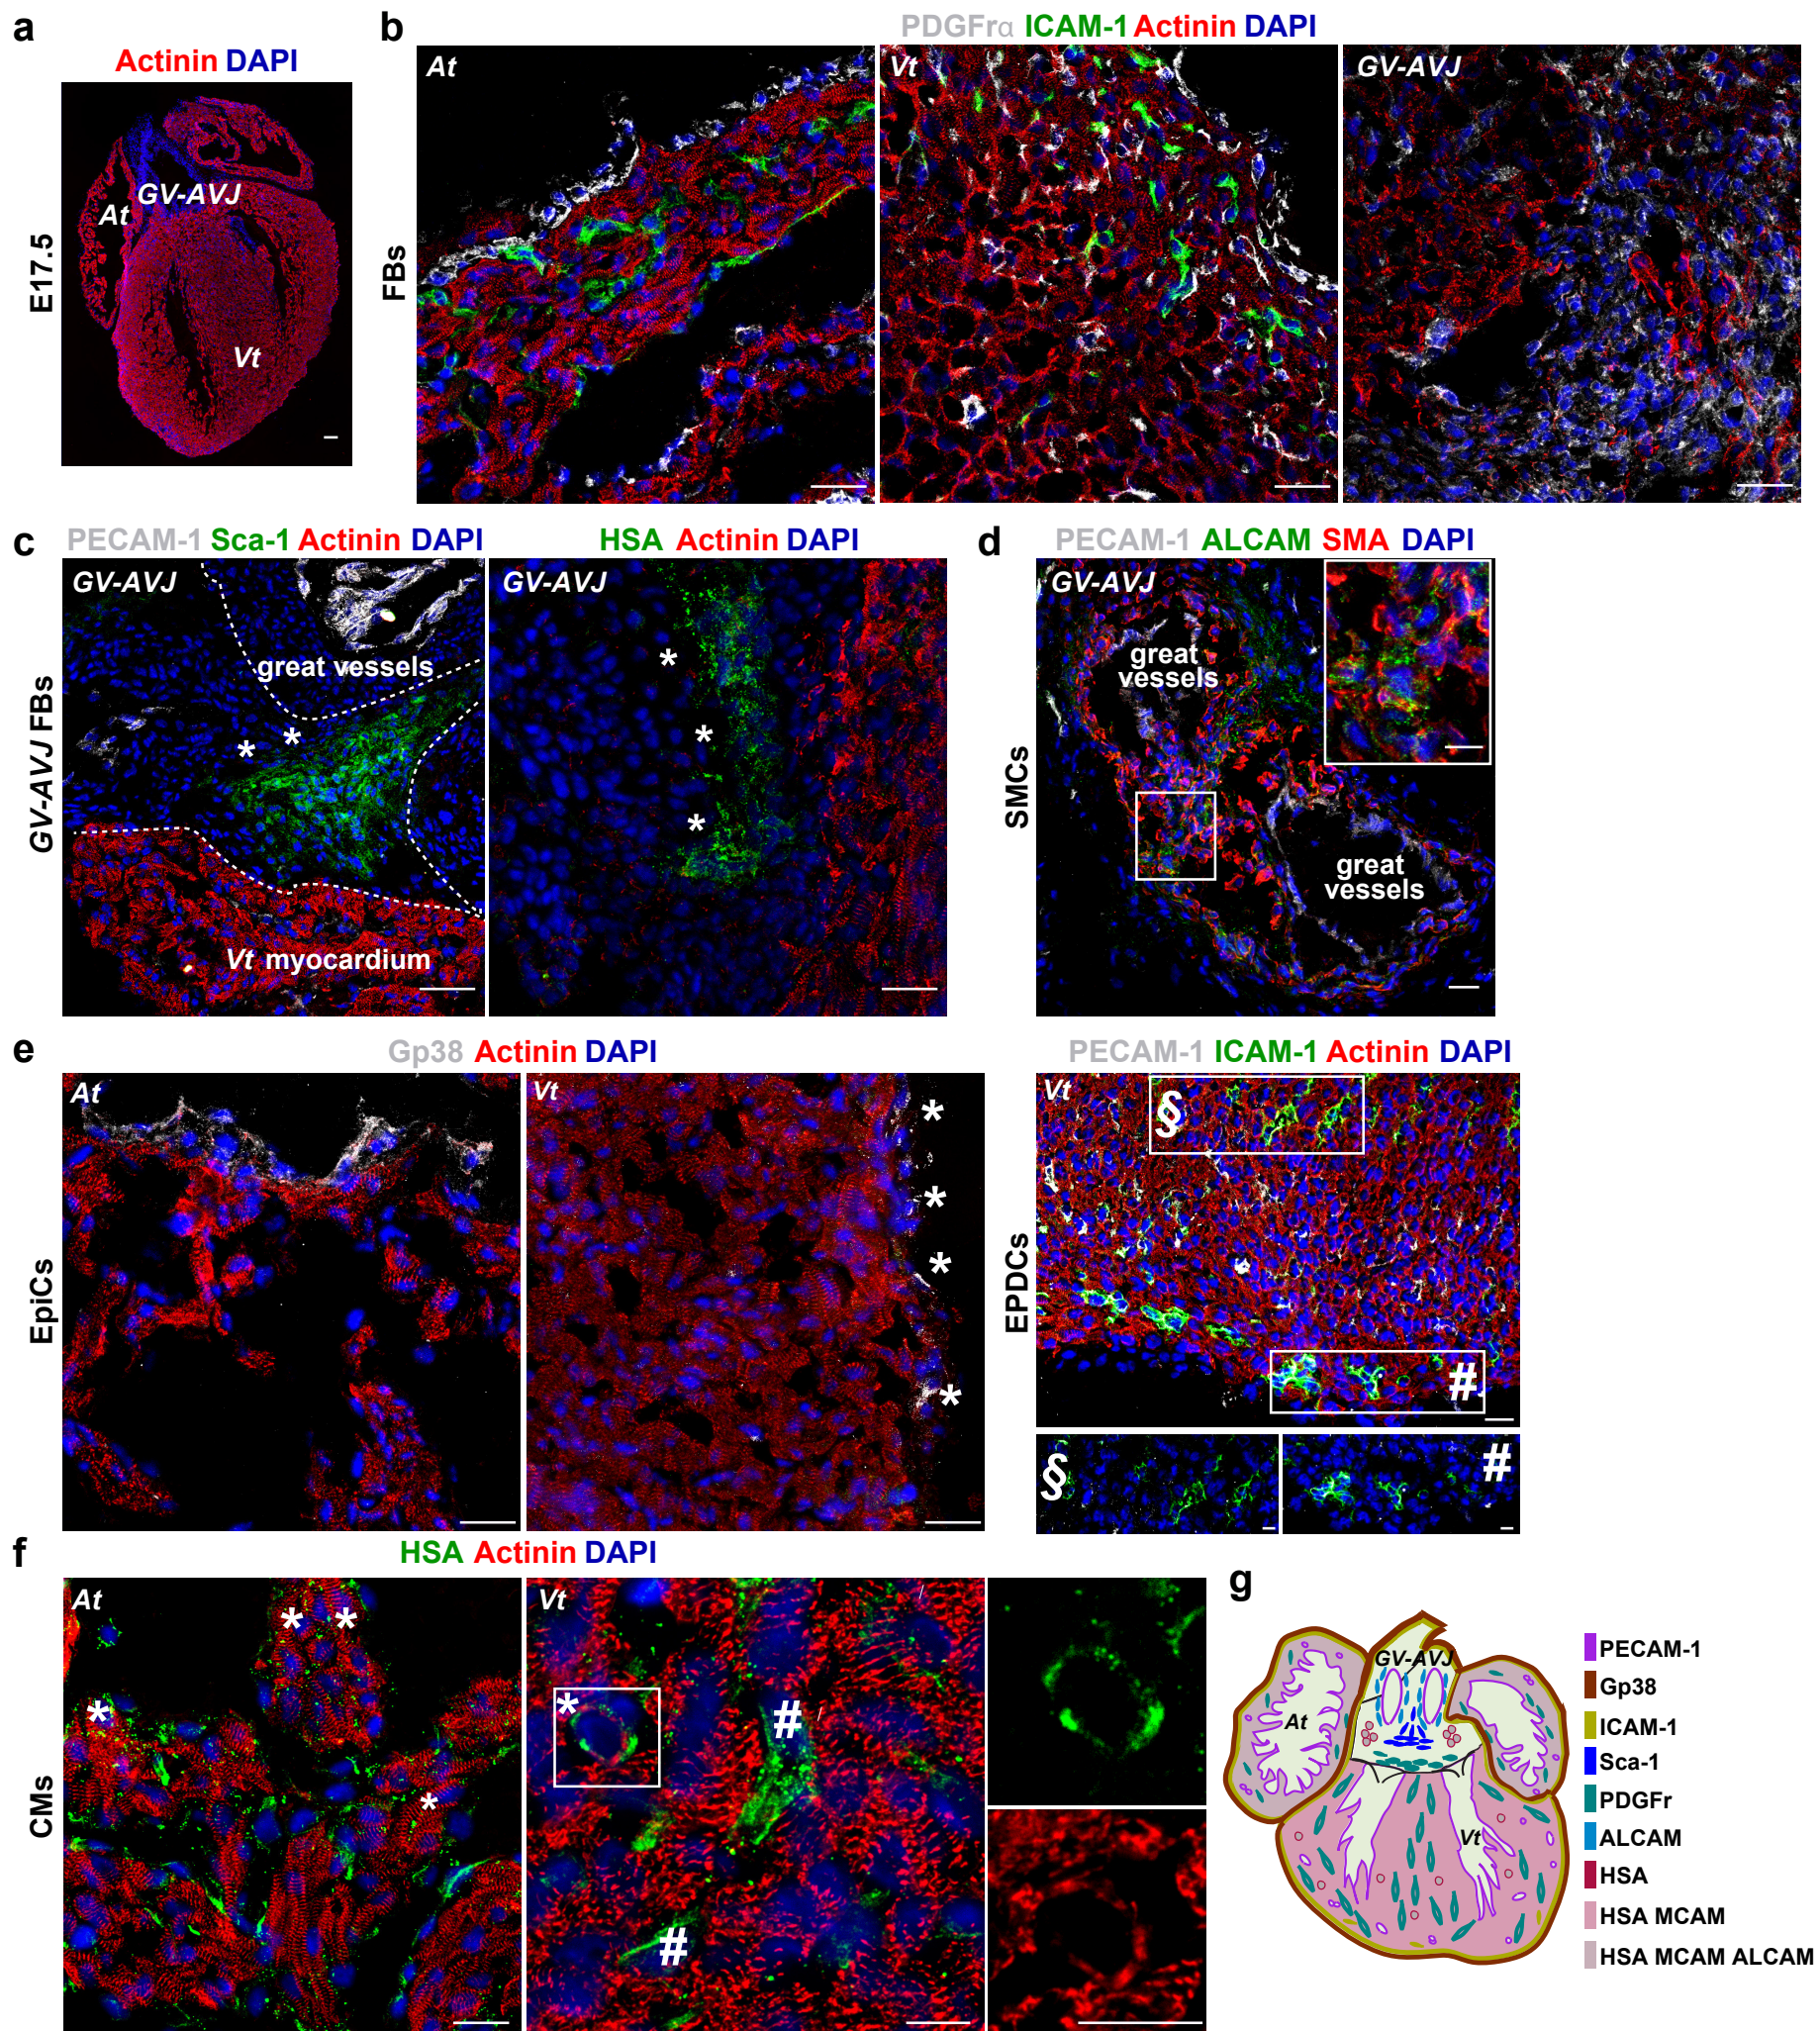

**Fig. 4**

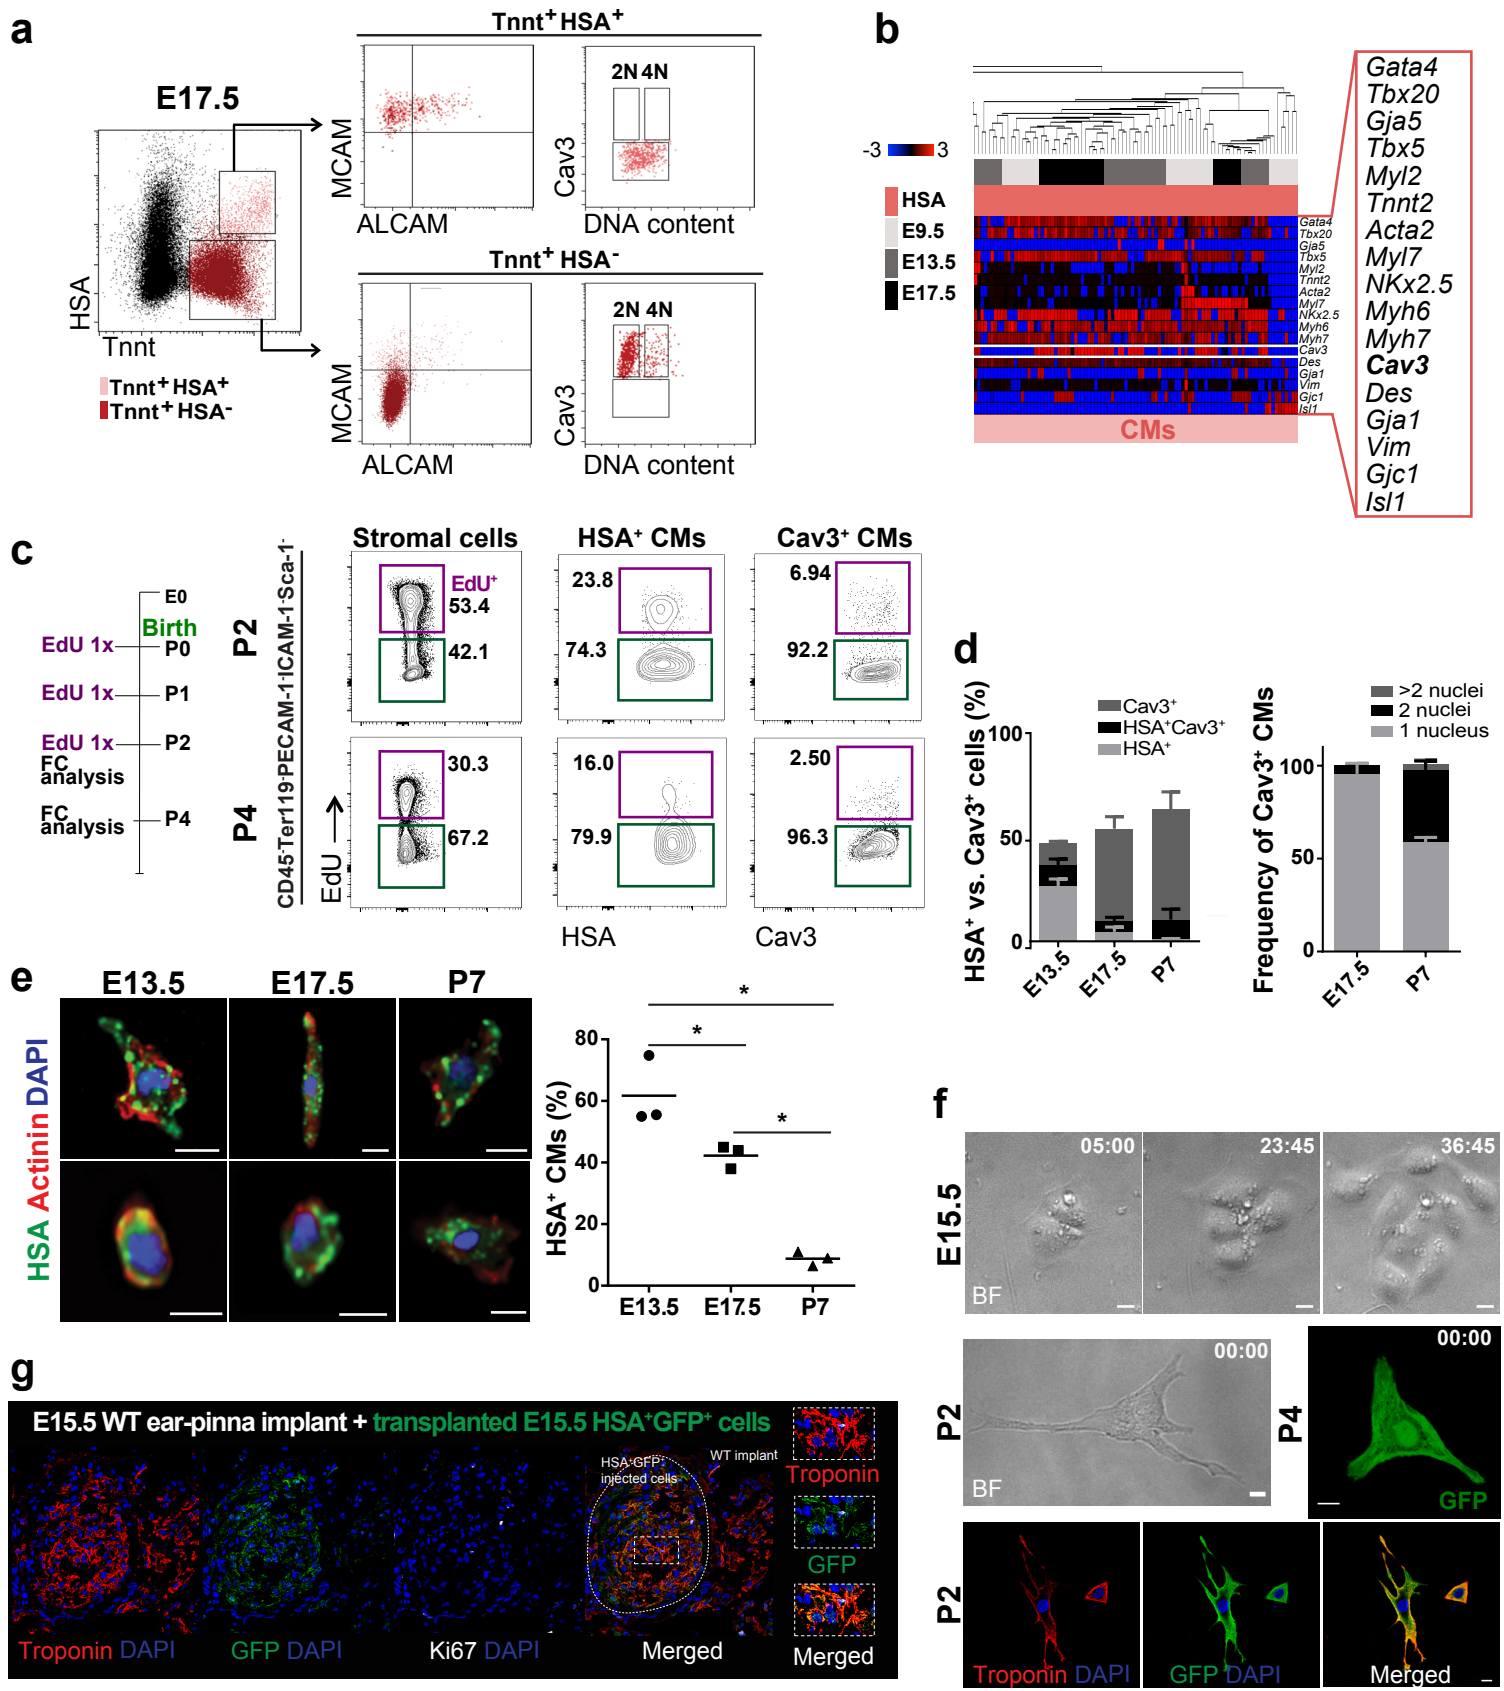

**Fig. 5****a**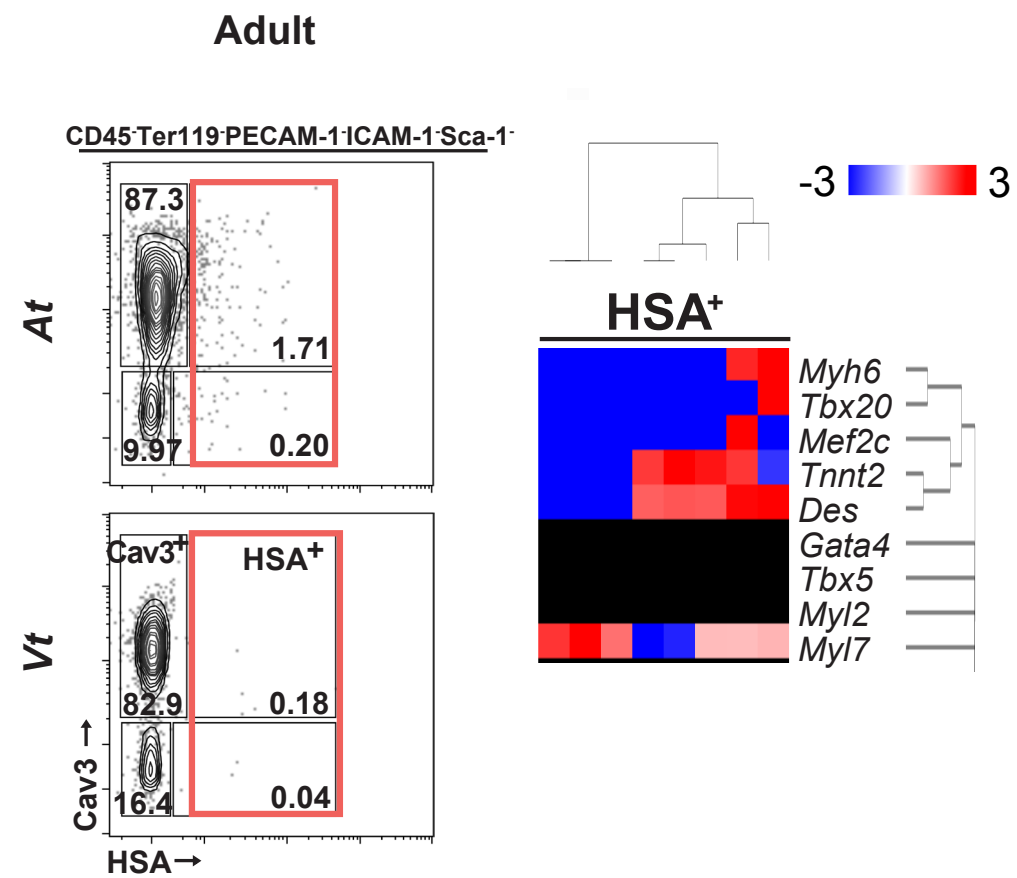**b**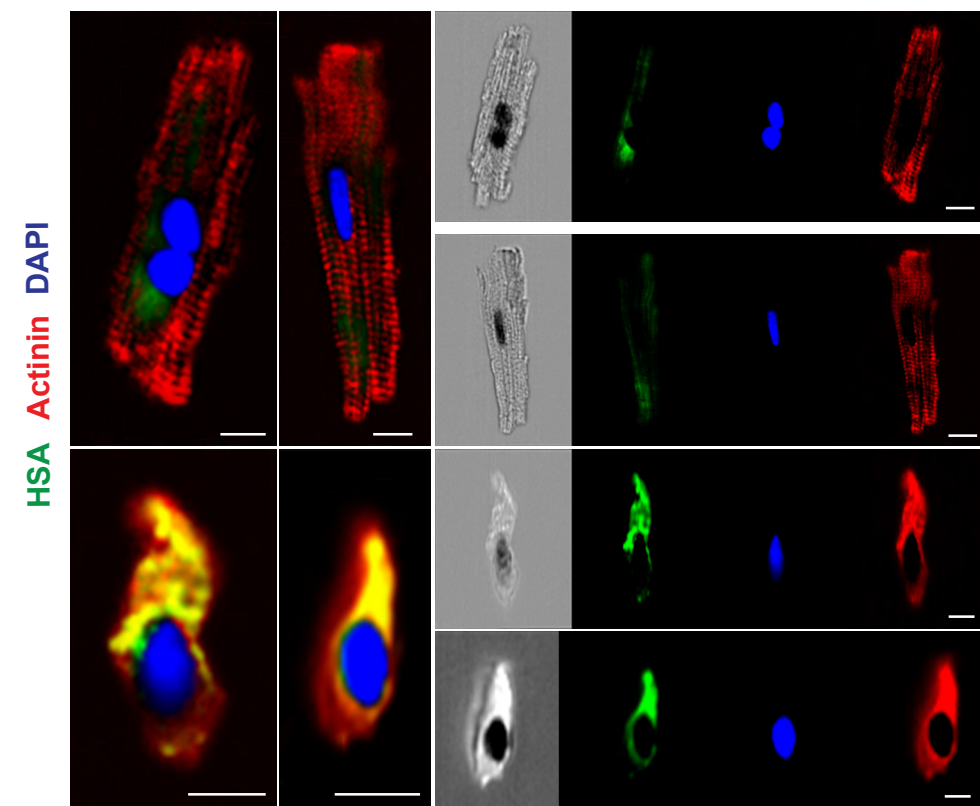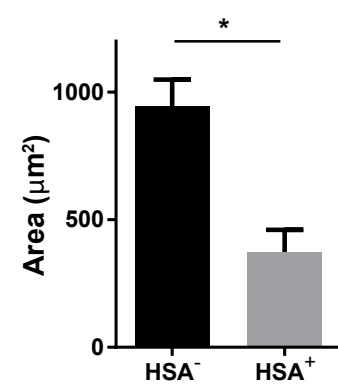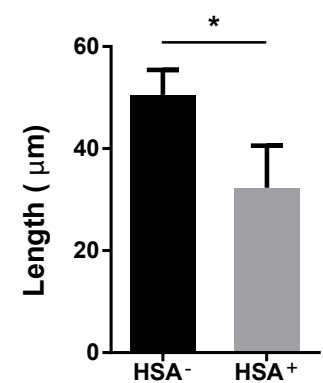**c**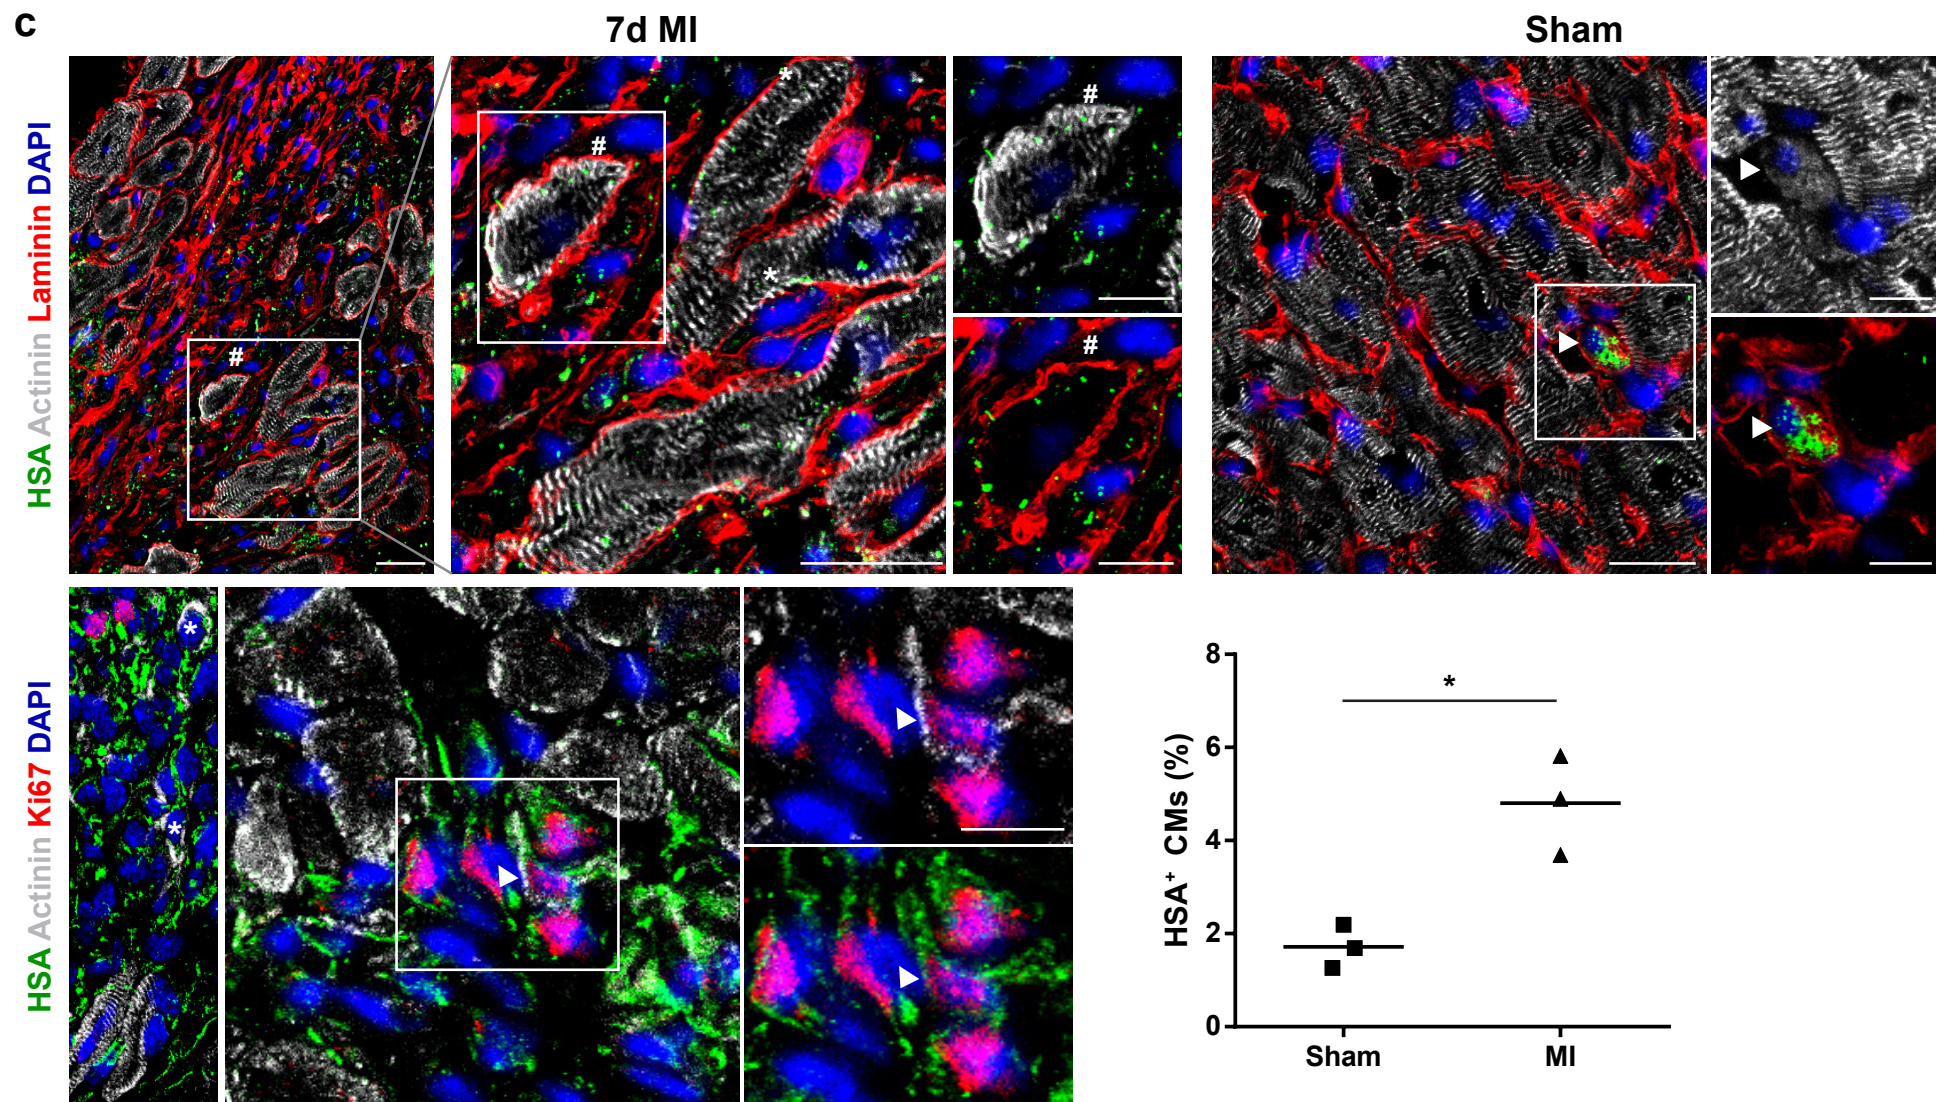**d**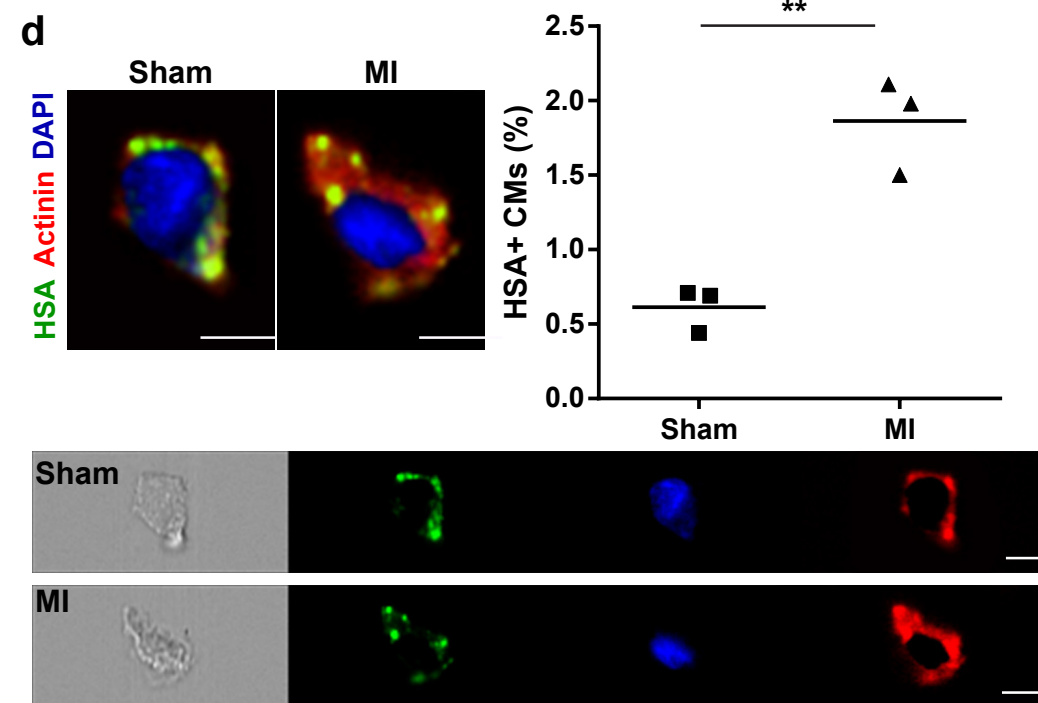

**E9.5****E13.5****E17.5****Adult sham****Adult MI****HSA<sup>+</sup>** ↻**HSA<sup>+</sup>**

0.6% ± 0.15%

↑ **HSA<sup>+</sup>**

1.8% ± 0.3%

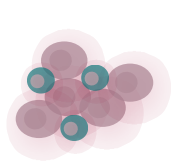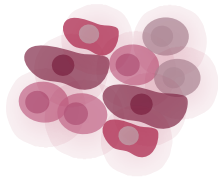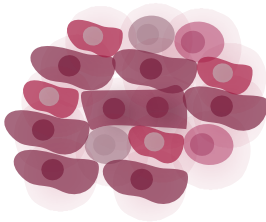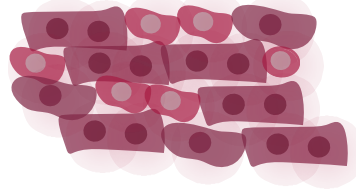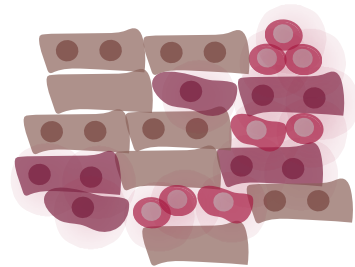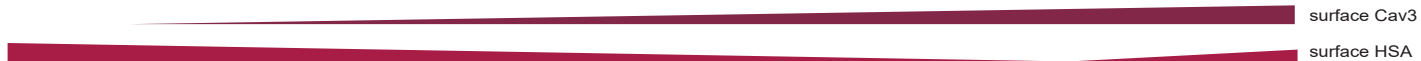

 HSA<sup>+</sup> MCAM<sup>+</sup> PDGFr<sup>+</sup> Cav3<sup>-</sup> (PRG)


 HSA<sup>+</sup> MCAM<sup>+</sup> Cav3<sup>-</sup>


 Cav3<sup>+</sup> HSA<sup>-</sup>


 HSA<sup>+</sup> MCAM<sup>+</sup> ALCAM<sup>+</sup> Cav3<sup>-</sup>


 HSA<sup>+</sup> Cav3<sup>-/-</sup>

Dead/dying CMs

Exclusion criteria for CM selection: CD45<sup>-</sup> TER119<sup>-</sup> PECAM-1<sup>-</sup> ICAM-1<sup>-</sup> Sca-1<sup>-</sup> Gp38<sup>-</sup> Thy1<sup>-</sup> PDGFr<sup>-</sup>

Transcriptional profile of CM: *Nkx2.5*, *Tnnt2*, *Des*, *Isl1*, *Gata4*, *Mef2c*, *Tbx20* and *Cav3*
